# Supplementary material for: Long Non-coding RNA 332443 Inhibits Preadipocyte Differentiation by Targeting Runx1 and p38-MAPK and ERK1/2-MAPK Signaling Pathways
Source: Front Cell Dev Biol. 2021 Jun 8;9:663959. doi: 10.3389/fcell.2021.663959 (PMC8217766; doi:10.3389/fcell.2021.663959)
Supplement: Supplementary file 4 [file Data_Sheet_2.XLSX]

## Sheet: Sheet1
groups	enrichmentTerm	ListHits	ListTotal	PopHits	PopTotal	p.value	q.value	enrichmentIDs	TransFactor
FR332443	Myc	120	484	3002	16638	0.000100825	0.000438653	0610010K14Rik; 9130023H24Rik; Acaca; Acy1; Ahnak2; Alg3; Amigo3; Anapc13; Ap2s1; Arl4a; Armc5; Atp5d; Bach2; Bckdha; Bhlhe40; Bop1; C1rl; Cars2; Cbx3; Cfl1; Copz1; Ctdsp2; Cuta; Dcxr; Ddrgk1; Dhcr7; Dhx40; Dhx58; Efnb1; Ehbp1l1; Eif5a; Enc1; Fam188b; Fasn; Foxk1; Foxn2; Foxo3; Foxp1; Fzr1; Gaa; Gadd45g; Galns; Glud1; Gmppb; Gpi1; Gpn3; Gps1; Gtf2h1; Herpud1; Insr; Ints1; Irs2; Kbtbd11; Kdm4b; Klf…	Myc
FR332443	Srebf1	92	484	2172	16638	0.000111528	0.000478999	0610010K14Rik; 1110008P14Rik; Ahnak2; Amigo3; Anapc13; Asna1; Atp5d; Atp5j2; Bhlhe40; Cabp4; Cars2; Cdh5; Cfl1; Cox5a; Ctdsp2; Ctns; Cuta; Dhx58; Ehbp1l1; Eif5a; Enc1; Fadd; Fads2; Fam129b; Fasn; Fndc5; Gaa; Galns; Gba; Ghdc; Gtf2h1; Herpud1; Hspbp1; Kcnab2; Klf6; Klhl24; Lactb2; Map2k2; Metrn; Mfsd11; Mfsd3; Mmab; Mrpl34; Mrps7; Mt1; Mt2; Myl7; Myo19; Naa50; Ndufa8; Nfkbia; Nfya; Nmral1; Nutf2; …	Srebf1
FR332443	Ar	95	484	2262	16638	0.000115074	0.00048797	0610010K14Rik; 4833420G17Rik; 8430408G22Rik; Aco2; Acy1; Adprhl2; Alg3; Amigo3; Armc5; Bckdha; Bhlhe40; Cars2; Cat; Cdk2ap1; Cebpd; Cfl1; Cops6; Crebl2; Cuta; Cyb561d2; D230025D16Rik; Dcxr; Dhcr7; Dhrs7; Dhx40; Dhx58; Efnb1; Ehbp1l1; Etfb; Fasn; Fibp; Fkbpl; Foxn2; Foxo3; Heca; Herpud1; Higd1a; Idi1; Ifit1; Kcnab2; Klf6; Klf9; Klhl21; Lrrc14; Med24; Metrn; Mfsd3; Mrpl33; Mrpl55; Mt1; Mt2; Myl7; N…	Ar
FR332443	Foxc1	73	484	1629	16638	0.000120571	0.000504891	0610010K14Rik; Acy1; Ak2; Aldoa; Alg3; Amigo3; Bach2; Bcl2l1; Bhlhe40; Cars2; Cbx3; Cdca7l; Cfl1; Cpeb2; Cuta; Cyb561d2; Dbt; Deb1; Ehbp1l1; Eif5a; Fkbp5; Foxo3; Ghdc; Gmppb; Herpud1; Herpud2; Hist1h3g; Kif12; Klf6; Klhl21; Map1lc3b; Med24; Mrps7; Naa50; Ndufb8; Ndufc1; Ndufv2; Nfkbia; Nfya; Nutf2; Ormdl3; Otud7b; Paip2b; Pfn1; Plekhh3; Pnpla2; Prmt5; Prpf6; Prune; Psmd1; Rab33a; Raf1; Rasa3; Rnf…	Foxc1
FR332443	Tcf4	82	484	1890	16638	0.000129395	0.000535154	0610010K14Rik; 1700029I15Rik; Abhd11; Acy1; Ahnak2; Aldoa; Armc5; Atp5d; Bhlhe40; Bsdc1; C1rl; Cacna2d2; Cfl1; Ctdsp2; Cuta; Cyb561d2; Dcxr; Dhcr7; Dhx58; Ehbp1l1; Fasn; Fzr1; Galns; Gba; Gps1; Gss; Gtf2h1; Ints1; Isg15; Kcnab2; Kcnip3; Kdm4b; Klf9; Klhl21; Lrrc14; Metrn; Mfsd3; Mmab; Mrpl34; Mrpl55; Mrps11; Mta1; Myl7; Ndufb10; Nmt2; Notch1; Ormdl3; Peli2; Pepd; Pex16; Pfkfb4; Pfn1; Plekhh3; Pnp…	Tcf4
FR332443	Sp2	56	484	1163	16638	0.000134429	0.000542642	0610010K14Rik; Acy1; Apip; Atp5d; B3gat3; Cars2; Ccdc159; Cfl1; Cuta; Dcxr; Dhcr7; Dhx58; Ecsit; Ehbp1l1; Fibp; Foxo3; Galns; Grtp1; Irs2; Isg15; Klf11; Lrrc14; Med24; Metrn; Mfsd3; Mrpl34; Mt1; Myl7; Ndufb8; Nmt2; Nutf2; Pfn1; Plekhh3; Pnpla2; Ppp1ca; Psmc3; Rasa3; Rnf126; Scarb1; Sgk1; Sh2b3; Slc25a1; Slc25a11; Slc27a1; Sssca1; Tbc1d17; Tcp11l2; Thoc6; Tpi1; Trabd; Unkl; Vasp; Wdr81; Wnt11; Zbt…	Sp2
FR332443	Stat4	84	484	1950	16638	0.000134446	0.000542642	0610010K14Rik; Aldoa; Armc5; Asna1; Atp5d; B3gat3; Bach2; Bcl2l1; Bhlhe40; C1rl; Cars2; Cbx3; Cfl1; Crebl2; Ctdsp2; Cuta; Cyb561d2; Ddrgk1; Ddx50; Dhx58; Dram2; Ehbp1l1; Eif5a; Etfb; Fam188b; Fibp; Foxp1; Gaa; Gpi1; Idi1; Keap1; Klf6; Klf9; Lrrc14; Mpdu1; Mt1; Mt2; Myo19; Naa50; Ndufb8; Ndufc1; Nfkbia; Nfya; Ormdl3; Pdss1; Pex16; Pfn1; Phyh; Pih1d1; Plekhh3; Pnpla2; Ppp1ca; Prmt5; Prune; Psmc4; P…	Stat4
FR332443	Runx3	59	484	1246	16638	0.000138355	0.000551775	1700029I15Rik; 4833420G17Rik; Acy1; Akap8l; Aldoa; Anapc13; Armc5; B3gat3; Cacna2d2; Chmp6; Cops6; Crebl2; Cyb561d2; Dhx58; Ehbp1l1; Eif5a; Fasn; Foxn2; Fzr1; Gps1; Herpud1; Hspbp1; Idi1; Ints1; Isg15; Kcnab2; Klf6; Klhl21; Ly6h; Metrn; Mrpl34; Myl7; Naa50; Ndufb10; Ormdl3; Peg3; Pex16; Plekhh3; Ppp1ca; Prmt5; Rhebl1; Rhod; Rnf126; Rpl13a; S100a4; Scarb1; Sh2b3; Sharpin; Slc25a1; Slc25a10; Sssca1…	Runx3
FR332443	Bach1	71	484	1581	16638	0.000141815	0.000558918	1700029I15Rik; 2810428I15Rik; AI413582; Acy1; Ahnak2; Aldoa; Apip; Apobec1; Atp5d; B3gat3; Bach2; Bhlhe40; Blmh; C1rl; Ccbl2; Cdca2; Cpeb2; Cyb561d2; Ecsit; Ehbp1l1; Emp2; Etfb; Fam129b; Fkbpl; Gpi1; Kcnab2; Klf6; Klhl21; Map1lc3b; Metrn; Mfsd3; Mpdu1; Mrpl48; Mrpl55; Ndufa12; Notch1; Ormdl3; Pex16; Pfkfb4; Pfn1; Pgs1; Plekhh3; Pnpla2; Ppp1ca; Ppp2r5b; Prmt5; Psmd1; Psmd12; Rnf126; Rpl13a; Rps19b…	Bach1
FR332443	Tfdp2	49	484	979	16638	0.000146131	0.000569232	Aco2; Ak2; Aldoa; Anapc13; Atp5d; BC031181; Cbx3; Cops3; Cpne5; Dhx40; Dnmt1; Dpyd; Fkbpl; Foxn2; Foxo3; Gba; Hist1h3f; Irs2; Isg15; Kcnip3; Keap1; Lpcat3; Lrch1; Matr3; Metrn; Mpdu1; Myl7; Ndufc1; Nfya; Nubp1; Parp4; Peg3; Pepd; Pfn1; Plekhh3; Pnpla2; Ppm1b; Rell1; Rfc3; Rhbdl3; Rhebl1; Slc25a1; Slc25a11; Slc25a17; Taf6l; Trim39; Ugp2; Wdr7; Zbtb4	Tfdp2
FR332443	Runx1	73	484	1647	16638	0.000168944	0.000650532	0610010K14Rik; 1700029I15Rik; 4833420G17Rik; Acy1; Akap8l; Aldoa; Anapc13; Armc5; B3gat3; Cacna2d2; Cars2; Ccdc159; Cfl1; Chmp6; Cops6; Crebl2; Cuta; Cyb561d2; Dhx58; Ehbp1l1; Eif5a; Fasn; Foxn2; Foxo3; Fzr1; Gps1; Herpud1; Hspbp1; Idi1; Ints1; Isg15; Kcnab2; Klf6; Klhl21; Ly6h; Metrn; Mrpl34; Myl7; Naa50; Ncan; Ndufb10; Ormdl3; Peg3; Pex16; Pfn1; Plekhh3; Pnpla2; Ppp1ca; Prmt5; Prpf6; Rasa3; Rhe…	Runx1
FR332443	Cebpb	79	484	1821	16638	0.000175883	0.000669553	0610010K14Rik; Abhd11; Acy1; Aldoa; Alkbh3; Ap2s1; Armc5; Atp5f1; Atp5g3; Bach2; Bcl2l1; Bhlhe40; Bscl2; C1rl; Ccdc159; Cfl1; Ctdsp2; Cuta; Cyb561d2; Deb1; Dhcr7; Ehbp1l1; Eif4a2; Enc1; Fam129b; Foxn2; Foxp1; Hist1h2ak; Kcnab2; Klf6; Klf9; Klhl24; Lrrc8a; Lrrc8b; Map1lc3b; Med24; Mpdu1; Mt1; Naa50; Ndrg2; Ndufb8; Ndufc1; Ndufs5; Nfkbia; Nfya; Pafah2; Pdss1; Pex16; Pfn1; Plekhh3; Ppm1b; Ppp1ca; Pr…	Cebpb
FR332443	Vdr	98	484	2379	16638	0.00017999	0.000674831	0610010K14Rik; Acox2; Acy1; Ahnak2; Akap8l; Aldoa; Amigo3; Appl2; Atp5d; B3gat3; Bhlhe40; Blmh; Cabp4; Cars2; Cfl1; Coq7; Cox5a; Cpeb2; Ctdsp2; Cuta; Dcxr; Echdc2; Ehbp1l1; Eif5a; Fasn; Foxo3; Foxp1; Glud1; Gmppb; Gpn3; Gtf2h1; Gtf2h4; Hspbp1; Idi1; Igfbp7; Isg15; Klf11; Klf6; Klhl21; Lrch1; Lrrc14; Lrrc8a; Map2k2; Med24; Metrn; Mfsd3; Mrpl34; Mrpl37; Mta1; Myl7; Ndufa12; Ndufb10; Ndufb11; Nfkbia…	Vdr
FR332443	Egr3	87	484	2055	16638	0.000181298	0.000674831	0610010K14Rik; 2810428I15Rik; Acaca; Acy1; Ahnak2; Akap8l; Asna1; Atp5d; Cabp4; Cars2; Cbx3; Ccdc159; Ccni; Cebpd; Cfl1; Cox5a; Cpeb2; Cuta; Dcxr; Dhcr7; Dhx58; Ecsit; Ehbp1l1; Fasn; Fibp; Foxn2; Foxo3; Gps1; Gtf2h4; Haus7; Insr; Ints1; Irs2; Isg15; Kbtbd11; Keap1; Klf11; Klf4; Lrrc14; Ly6h; Map1lc3b; Map2k2; Matr3; Med24; Metrn; Mfsd3; Mrpl34; Mrpl55; Mrps7; Myl7; N4bp2l1; Ndufb10; Nfya; Nhej1; …	Egr3
FR332443	Arhgef7	96	484	2325	16638	0.000195761	0.000712824	0610010K14Rik; 5730508B09Rik; 8430408G22Rik; Acox2; Ahnak2; Amigo3; Atp5d; Atp5j2; Bin1; Bscl2; Bsdc1; C1rl; Cat; Ccbl2; Cfl1; Chmp6; Cops6; Cuta; Dcxr; Ddrgk1; Deb1; Dhx58; Dnajb2; Ehbp1l1; Eif5a; Etfb; Fads2; Fasn; Fibp; Foxk1; Foxp1; Fzr1; Gaa; Galns; Gmppb; Grina; Gtf2h4; Heca; Ino80c; Inpp5k; Kcnab2; Kcnip3; Klf11; Klf6; Klf9; Las1l; Med11; Med24; Mfsd11; Mmab; Mrps7; Mt1; Mt2; Mta1; Myl7; N…	Arhgef7
FR332443	Cd40	96	484	2325	16638	0.000195761	0.000712824	0610010K14Rik; 5730508B09Rik; 8430408G22Rik; Acox2; Ahnak2; Amigo3; Atp5d; Atp5j2; Bin1; Bscl2; Bsdc1; C1rl; Cat; Ccbl2; Cfl1; Chmp6; Cops6; Cuta; Dcxr; Ddrgk1; Deb1; Dhx58; Dnajb2; Ehbp1l1; Eif5a; Etfb; Fads2; Fasn; Fibp; Foxk1; Foxp1; Fzr1; Gaa; Galns; Gmppb; Grina; Gtf2h4; Heca; Ino80c; Inpp5k; Kcnab2; Kcnip3; Klf11; Klf6; Klf9; Las1l; Med11; Med24; Mfsd11; Mmab; Mrps7; Mt1; Mt2; Mta1; Myl7; N…	Cd40
FR332443	Hoxa7	45	484	891	16638	0.00022514	0.000810987	0610010K14Rik; Alg3; Apip; Bach2; Bloc1s3; C2cd3; Cat; Ctdsp2; Cyb561d2; Deb1; Dhcr7; Eif5a; Gpn3; Gss; Ifit1; Kcnab2; Kdm3b; Klf6; Lrrc20; Mpdu1; Mrpl34; Mt1; Naa50; Ndrg2; Ndufb8; Nfkbia; Nfya; Nmral1; Nol12; Ormdl3; Pafah2; Pdk1; Prmt5; Psmc4; Ptp4a1; Rhebl1; Rnf41; Rps8; S100a4; Slc25a42; Slc41a1; Tcp11l2; Ttc9c; Vcp; Wdr81	Hoxa7
FR332443	Nr5a2	44	484	870	16638	0.000256814	0.000905608	0610010K14Rik; 2810428I15Rik; Acy1; Amigo3; Atp5d; Atp5j2; Cfl1; Cyb561d2; Ehbp1l1; Fasn; Fibp; Gmppb; Klf6; Lrrc14; Metrn; Mfsd3; Mrs2; Myl7; Ndrg2; Nol12; Pafah2; Pfkfb4; Plekhh3; Pnpla2; Ppp1ca; Rnf126; Rpl13a; Rps19bp1; S100a4; Sbk1; Sh2b3; Sharpin; Slc25a1; Slc25a10; Slc5a2; Sssca1; Taf6l; Tceb2; Thoc6; Tpi1; Trabd; Unkl; Vasp; Wdr81	Nr5a2
FR332443	P2rx5	44	484	870	16638	0.000256814	0.000905608	0610010K14Rik; 2810428I15Rik; Acy1; Amigo3; Atp5d; Atp5j2; Cfl1; Cyb561d2; Ehbp1l1; Fasn; Fibp; Gmppb; Klf6; Lrrc14; Metrn; Mfsd3; Mrs2; Myl7; Ndrg2; Nol12; Pafah2; Pfkfb4; Plekhh3; Pnpla2; Ppp1ca; Rnf126; Rpl13a; Rps19bp1; S100a4; Sbk1; Sh2b3; Sharpin; Slc25a1; Slc25a10; Slc5a2; Sssca1; Taf6l; Tceb2; Thoc6; Tpi1; Trabd; Unkl; Vasp; Wdr81	P2rx5
FR332443	Cebpd	71	484	1617	16638	0.000276406	0.000964542	0610010K14Rik; Abhd11; Acy1; Aldoa; Armc5; Atp5g3; Bach2; Bcl2l1; Bhlhe40; Bscl2; Cbx3; Cfl1; Coq7; Ctdsp2; Cuta; Cyb561d2; Dhcr7; Echdc2; Ehbp1l1; Enc1; Foxn2; Foxp1; Gba; Hist1h2ak; Hist1h3f; Kcnab2; Klf6; Klf9; Klhl24; Lrrc20; Map1lc3b; Med24; Mpdu1; Naa50; Ndufb8; Ndufc1; Nfkbia; Nfya; Pafah2; Pex16; Pex5; Pfn1; Pgs1; Plekhh3; Ppp1ca; Prmt5; Prune; Psmc3ip; Rnf41; Rpl13a; S100a4; Sgk1; Sh2b3;…	Cebpd
FR332443	Klf12	43	484	848	16638	0.000285624	0.000986435	0610010K14Rik; Acy1; Ahnak2; Atp5d; Bhlhe40; Cars2; Cfl1; Cuta; Cyb561d2; Dcxr; Ehbp1l1; Fasn; Foxo3; Kcnab2; Klf6; Klhl21; Lrrc14; Metrn; Mfsd3; Mrpl55; Myl7; Ndufb10; Notch1; Pfn1; Plekhh3; Pnpla2; Ppp1ca; Prpf6; Rasa3; S100a4; Sh2b3; Sharpin; Slc25a1; Slc25a11; Sssca1; Tbc1d17; Tbl3; Thoc6; Tpi1; Trabd; Wdr81; Zadh2; Zbtb4	Klf12
FR332443	Cebpa	115	484	2934	16638	0.000328224	0.00112199	0610010K14Rik; Acy1; Aldoa; Anapc13; Armc5; Asna1; Atp5d; Atp5g3; BC031181; Bach2; Bcl2l1; Bhlhe40; Bscl2; Cabp4; Cacna2d2; Cars2; Cbx3; Cfl1; Cops6; Cox7a2l; Ctdsp2; Cuta; Cyb561d2; Dhcr7; Dhx58; Efnb1; Ehbp1l1; Eif4a2; Enc1; Fads2; Fam129b; Fam188b; Fasn; Foxo3; Foxp1; Grina; Hist1h2ak; Hist1h3f; Kcnab2; Kdm3b; Klf6; Klf9; Klhl21; Klhl24; Lrrc8a; Map1lc3b; Matr3; Mdh1; Med24; Mfsd3; Mpdu1; Mrpl…	Cebpa
FR332443	4921515J06RIK	43	484	858	16638	0.000365586	0.00115539	0610010K14Rik; Acy1; Armc5; Atp5d; Bhlhe40; C1rl; Cfl1; Ctdsp2; Cuta; Dcxr; Dhcr7; Ehbp1l1; Fasn; Fzr1; Galns; Gps1; Gtf2h1; Ints1; Kdm4b; Lrrc14; Metrn; Mfsd3; Mmab; Mrpl55; Mta1; Myl7; Notch1; Pepd; Pfn1; Plekhh3; Ppp1ca; S100a4; Sh2b3; Sharpin; Sirt1; Slc25a10; Slc25a11; Taf6l; Tbc1d17; Thoc6; Trabd; Vasp; Wdr81	4921515J06RIK
FR332443	Hand1	43	484	858	16638	0.000365586	0.00115539	0610010K14Rik; Acy1; Armc5; Atp5d; Bhlhe40; C1rl; Cfl1; Ctdsp2; Cuta; Dcxr; Dhcr7; Ehbp1l1; Fasn; Fzr1; Galns; Gps1; Gtf2h1; Ints1; Kdm4b; Lrrc14; Metrn; Mfsd3; Mmab; Mrpl55; Mta1; Myl7; Notch1; Pepd; Pfn1; Plekhh3; Ppp1ca; S100a4; Sh2b3; Sharpin; Sirt1; Slc25a10; Slc25a11; Taf6l; Tbc1d17; Thoc6; Trabd; Vasp; Wdr81	Hand1
FR332443	Hand2	43	484	858	16638	0.000365586	0.00115539	0610010K14Rik; Acy1; Armc5; Atp5d; Bhlhe40; C1rl; Cfl1; Ctdsp2; Cuta; Dcxr; Dhcr7; Ehbp1l1; Fasn; Fzr1; Galns; Gps1; Gtf2h1; Ints1; Kdm4b; Lrrc14; Metrn; Mfsd3; Mmab; Mrpl55; Mta1; Myl7; Notch1; Pepd; Pfn1; Plekhh3; Ppp1ca; S100a4; Sh2b3; Sharpin; Sirt1; Slc25a10; Slc25a11; Taf6l; Tbc1d17; Thoc6; Trabd; Vasp; Wdr81	Hand2
FR332443	Mad1l1	43	484	858	16638	0.000365586	0.00115539	0610010K14Rik; Acy1; Armc5; Atp5d; Bhlhe40; C1rl; Cfl1; Ctdsp2; Cuta; Dcxr; Dhcr7; Ehbp1l1; Fasn; Fzr1; Galns; Gps1; Gtf2h1; Ints1; Kdm4b; Lrrc14; Metrn; Mfsd3; Mmab; Mrpl55; Mta1; Myl7; Notch1; Pepd; Pfn1; Plekhh3; Ppp1ca; S100a4; Sh2b3; Sharpin; Sirt1; Slc25a10; Slc25a11; Taf6l; Tbc1d17; Thoc6; Trabd; Vasp; Wdr81	Mad1l1
FR332443	Mxd1	43	484	858	16638	0.000365586	0.00115539	0610010K14Rik; Acy1; Armc5; Atp5d; Bhlhe40; C1rl; Cfl1; Ctdsp2; Cuta; Dcxr; Dhcr7; Ehbp1l1; Fasn; Fzr1; Galns; Gps1; Gtf2h1; Ints1; Kdm4b; Lrrc14; Metrn; Mfsd3; Mmab; Mrpl55; Mta1; Myl7; Notch1; Pepd; Pfn1; Plekhh3; Ppp1ca; S100a4; Sh2b3; Sharpin; Sirt1; Slc25a10; Slc25a11; Taf6l; Tbc1d17; Thoc6; Trabd; Vasp; Wdr81	Mxd1
FR332443	Mxi1	43	484	858	16638	0.000365586	0.00115539	0610010K14Rik; Acy1; Armc5; Atp5d; Bhlhe40; C1rl; Cfl1; Ctdsp2; Cuta; Dcxr; Dhcr7; Ehbp1l1; Fasn; Fzr1; Galns; Gps1; Gtf2h1; Ints1; Kdm4b; Lrrc14; Metrn; Mfsd3; Mmab; Mrpl55; Mta1; Myl7; Notch1; Pepd; Pfn1; Plekhh3; Ppp1ca; S100a4; Sh2b3; Sharpin; Sirt1; Slc25a10; Slc25a11; Taf6l; Tbc1d17; Thoc6; Trabd; Vasp; Wdr81	Mxi1
FR332443	Mycn	43	484	858	16638	0.000365586	0.00115539	0610010K14Rik; Acy1; Armc5; Atp5d; Bhlhe40; C1rl; Cfl1; Ctdsp2; Cuta; Dcxr; Dhcr7; Ehbp1l1; Fasn; Fzr1; Galns; Gps1; Gtf2h1; Ints1; Kdm4b; Lrrc14; Metrn; Mfsd3; Mmab; Mrpl55; Mta1; Myl7; Notch1; Pepd; Pfn1; Plekhh3; Ppp1ca; S100a4; Sh2b3; Sharpin; Sirt1; Slc25a10; Slc25a11; Taf6l; Tbc1d17; Thoc6; Trabd; Vasp; Wdr81	Mycn
FR332443	Tal2	43	484	858	16638	0.000365586	0.00115539	0610010K14Rik; Acy1; Armc5; Atp5d; Bhlhe40; C1rl; Cfl1; Ctdsp2; Cuta; Dcxr; Dhcr7; Ehbp1l1; Fasn; Fzr1; Galns; Gps1; Gtf2h1; Ints1; Kdm4b; Lrrc14; Metrn; Mfsd3; Mmab; Mrpl55; Mta1; Myl7; Notch1; Pepd; Pfn1; Plekhh3; Ppp1ca; S100a4; Sh2b3; Sharpin; Sirt1; Slc25a10; Slc25a11; Taf6l; Tbc1d17; Thoc6; Trabd; Vasp; Wdr81	Tal2
FR332443	Foxo4	68	484	1549	16638	0.000379345	0.00117992	4833420G17Rik; Arl4a; Atp5f1; Bach2; Bop1; Bscl2; Bub1; Ccpg1; Cdca7l; Crebl2; Ctdsp2; Cuta; Dhrs7; Dpyd; Eif5a; Enc1; Fkbp5; Foxo3; Foxp1; Gadd45g; Heca; Herpud1; Hist1h2ab; Hist1h3g; Idi1; Inpp5k; Insr; Irs2; Kdm3b; Kdm4b; Klf6; Klhl24; Lrch1; Map1lc3b; Matr3; Med24; Mmab; Mrpl37; Ndrg2; Ndufb8; Ormdl3; Pafah2; Paip2b; Pcgf5; Pcnp; Peli2; Ppp2r5b; Prune; Raf1; Rdm1; Rps8; S100pbp; Sdhc; Sgk1; S…	Foxo4
FR332443	Runx2	71	484	1635	16638	0.000380391	0.00117992	0610010K14Rik; 1700029I15Rik; 4833420G17Rik; Acy1; Akap8l; Aldoa; Amigo3; Anapc13; Armc5; Atp5d; B3gat3; Cacna2d2; Ccdc159; Cfl1; Chmp6; Cops6; Crebl2; Cyb561d2; Dhx58; Ehbp1l1; Eif5a; Fasn; Foxn2; Fzr1; Gmppb; Gps1; Herpud1; Hspbp1; Idi1; Ints1; Isg15; Kcnab2; Klf6; Klhl21; Lrrc14; Ly6h; Metrn; Mfsd3; Mrpl34; Myl7; Naa50; Ncan; Ndufb10; Ormdl3; Peg3; Pex16; Plekhh3; Pnpla2; Ppp1ca; Prmt5; Rasa3;…	Runx2
FR332443	Hic1	59	484	1298	16638	0.000402267	0.00123633	0610010K14Rik; Acy1; Ahnak2; Atp5d; Bhlhe40; Cbx3; Cdk2ap1; Cebpd; Cfl1; Cpeb2; Ctdsp2; Ehbp1l1; Eif5a; Fasn; Fbxo21; Foxo3; Foxp1; Gaa; Gnb1l; Gpi1; Gsx1; Inpp5k; Insr; Ints1; Irs2; Kcnip3; Keap1; Lrrc14; Map1lc3b; Metrn; Mfsd11; Mfsd3; Mpdu1; Ndufab1; Ndufb10; Nfkbia; Nfya; Nudt1; Pfn1; Phc3; Phyh; Plekhh3; Pnpla2; Ppm1b; Prpf6; Rnf126; Sh2b3; Sharpin; Slc25a10; Slc25a11; Slc41a1; Snrpd2; Tbc1d…	Hic1
FR332443	Elk4	44	484	889	16638	0.000407372	0.00124063	9130023H24Rik; Adprhl2; Aldoa; Alkbh3; Ap2s1; Appl2; B3gat3; Bcl2l1; C2cd3; Cfl1; Copz1; Ddrgk1; Dhrs7; Dnmt1; Eif5a; Etfb; Fibp; Gde1; Gtf2h1; Hspbp1; Idi1; Lrrc14; Med12; Metrn; Mfsd3; Mt1; Mt2; Myl7; Myo19; Nmt2; Nol12; Nsun3; Nudt1; Pex16; Pfn1; Pih1d1; Pnpla2; Psmd12; Rps19bp1; Setd8; Slc25a11; Syf2; Tbc1d17; Trabd	Elk4
FR332443	Stat3	97	484	2407	16638	0.000427056	0.00128135	0610010K14Rik; Acy1; Aldoa; Anapc13; Ap1s1; Armc5; Asna1; Atp5d; B3gat3; Bach2; Bhlhe40; C1qtnf2; C1rl; Car13; Cars2; Cfl1; Crebl2; Ctdsp2; Ctns; Cuta; Cyb561d2; Dbt; Ddrgk1; Ddx50; Dhx58; Dpyd; Dram2; Ehbp1l1; Eif5a; Etfb; Fam188b; Fasn; Fibp; Foxk1; Foxo3; Gaa; Gpi1; Gtf2h4; Idh3a; Ints1; Keap1; Klf6; Lrrc14; Map1lc3b; Matr3; Metrn; Mfsd3; Mpdu1; Mt1; Mt2; Myl7; Myo19; Nfkbia; Notch1; Ormdl3; O…	Stat3
FR332443	Nr1i2	83	484	1991	16638	0.000428392	0.00128135	0610010K14Rik; Abhd11; Acaca; Acox2; Acy1; Ahnak2; Aldoa; Amigo3; Atp5d; Atp5f1; Bach2; Bhlhe40; Bscl2; Cars2; Ccdc159; Cfl1; Ctdsp2; Cuta; Cyb561d2; Deb1; Echdc2; Ehbp1l1; Eif5a; Fasn; Foxo3; Gmppb; Igfbp7; Inpp5k; Isg15; Kcnab2; Kdm3b; Klf11; Klf6; Klhl21; Lpcat3; Lrrc14; Map1lc3b; Metrn; Mfsd3; Mpdu1; Mrpl13; Mrpl37; Mta1; Myl7; Ndufb10; Ndufc1; Nhej1; Notch1; Ormdl3; Pepd; Pex16; Pfn1; Plekhh…	Nr1i2
FR332443	Ep300	42	484	844	16638	0.000494044	0.00146464	0610010K14Rik; 2810428I15Rik; Acy1; Adprhl2; Ahnak2; Atp5d; Bach2; Bcl2l1; Bhlhe40; Cars2; Cfl1; Ctdsp2; Cuta; Ehbp1l1; Fasn; Fibp; Foxp1; Klf6; Metrn; Mfsd3; Mrpl34; Myl7; Ndrg2; Nfya; Peli3; Pex16; Pfn1; Plekhh3; Pnpla2; Ppp1ca; Prpf6; Rasa3; S100a4; Sh2b3; Sharpin; Slc25a11; Sssca1; Tbl3; Thoc6; Vasp; Wdr81; Zadh2	Ep300
FR332443	Pitx2	45	484	925	16638	0.000505599	0.0014777	Abhd11; Acaca; Aldoa; Asna1; Atp5j2; Ccpg1; Copz1; Cox5a; Dnmt1; Ecsit; Fibp; Fkbpl; Gpi1; Gtf3c6; Kank3; Keap1; Lrrc8a; Map1lc3b; Mkrn1; Ndufab1; Ndufs5; Nmral1; Nutf2; Opa3; Pgs1; Phyh; Pih1d1; Ppp1r8; Psmd12; Rabac1; Raf1; Rfc2; Rnf114; Rnf41; Rpl13a; Rps6kb1; Setd8; Slc27a1; Snrpd2; Taf6l; Tars2; Tmem223; Ttc9c; Unkl; Zbtb4	Pitx2
FR332443	Brca1	53	484	1143	16638	0.000507272	0.0014777	0610010K14Rik; Acy1; Amigo3; Atp5d; Bcl2l1; Bhlhe40; Cars2; Cfl1; Cuta; Cyb561d2; Deb1; Ehbp1l1; Eif5a; Fasn; Foxp1; Idi1; Kcnab2; Klf6; Lrrc14; Med24; Metrn; Mfsd3; Mpdu1; Myl7; Ndufb8; Nfya; Notch1; Ormdl3; Pex16; Pfn1; Plekhh3; Pnpla2; Ppp1ca; Rasa3; S100a4; Sh2b3; Sharpin; Slc25a1; Slc25a11; Sssca1; Tbc1d17; Tbl3; Tceb2; Tcp11l2; Thoc6; Tpi1; Trabd; Tubb5; Unkl; Vcp; Wdr81; Zadh2; Zbtb4	Brca1
FR332443	Stat6	90	484	2213	16638	0.000535393	0.00154618	0610010K14Rik; Acy1; Aldoa; Armc5; Asna1; Atp5d; B3gat3; Bach2; Bcl2l1; Bhlhe40; C1rl; Cars2; Cbx3; Cfl1; Crebl2; Ctdsp2; Cuta; Cyb561d2; Ddrgk1; Ddx50; Dhx58; Dram2; Ehbp1l1; Eif5a; Enc1; Etfb; Fam188b; Fibp; Foxo3; Foxp1; Gaa; Gpi1; Idi1; Keap1; Klf6; Klf9; Lrrc14; Mpdu1; Mt1; Mt2; Myo19; Naa50; Ndufb8; Ndufc1; Nfkbia; Nfya; Notch1; Ormdl3; Pdss1; Pex16; Pfn1; Phyh; Pih1d1; Plekhh3; Pnpla2; Ppp…	Stat6
FR332443	Nrf1	72	484	1687	16638	0.000565038	0.00161785	1700029I15Rik; 2810428I15Rik; Acy1; Aldoa; Ap2s1; Atp5d; B3gat3; Bhlhe40; Blmh; C1rl; Cars2; Ccni; Cfl1; Cpeb2; Cyb561d2; D230025D16Rik; Ddrgk1; Deb1; Dnmt1; Ehbp1l1; Eif5a; Fam98a; Gpi1; Gpn3; Ino80c; Kcnab2; Klhl21; Lrch1; Lrrc14; Map1lc3b; Metrn; Mfsd3; Mpdu1; Mrpl55; Nfya; Nhej1; Notch1; Ormdl3; Pdxdc1; Pex16; Pfn1; Pgam1; Pgs1; Phc3; Plekhh3; Pnpla2; Ppp1ca; Prpf6; Psma4; Psmd1; Rnf126; Rpl1…	Nrf1
FR332443	Pax3	43	484	879	16638	0.000601821	0.00170856	Atp5d; Bcl2l1; Bhlhe40; Ccdc159; Cdca7l; Cfl1; Ehbp1l1; Eif5a; Emp2; Enc1; Gba; Herpud1; Idi1; Lrrc14; Map1lc3b; Matr3; Med11; Mfsd3; Mrpl21; Mt2; Mta1; N4bp2l1; Ndufc1; Nfkbia; Nmral1; Ormdl3; Pgs1; Phyh; Plekhh3; Pnpla2; Psmc3; Rasa3; Rps19bp1; Sharpin; Slc35f5; Snx33; Ssh2; Sssca1; Tbc1d17; Trabd; Wdr81; Zadh2; Zbtb4	Pax3
FR332443	Hes1	42	484	856	16638	0.000656019	0.00184678	0610010K14Rik; Ap2s1; Atp5d; Bach2; Cbx3; Cfl1; Cyb561d2; Dcxr; Ehbp1l1; Fasn; Galns; Gpi1; Gps1; Ints1; Irs2; Klf11; Lrrc14; Map1lc3b; Metrn; Mfsd3; Mrps7; Mta1; Notch1; Pfn1; Plekhh3; Pnpla2; Prpf6; Rnf126; Sh2b3; Sharpin; Slc25a1; Slc25a10; Slc25a11; Sssca1; Tbl3; Thoc6; Timm13; Trabd; Tubb5; Wdr81; Wnt11; Zadh2	Hes1
FR332443	Maz	41	484	833	16638	0.000714654	0.00199508	0610010K14Rik; Acy1; Aldoa; Atp5d; Bhlhe40; Cbx3; Ccdc159; Cfl1; Cuta; Ehbp1l1; Eif5a; Etfb; Fasn; Fibp; Foxo3; Isg15; Lrrc14; Med24; Metrn; Mfsd3; Ndrg2; Notch1; Ormdl3; Pex16; Pfn1; Plekhh3; Pnpla2; Ppp1ca; S100a4; Sh2b3; Sh3pxd2a; Slc25a1; Slc25a11; Sssca1; Tbl3; Thoc6; Trabd; Vasp; Wdr81; Zadh2; Zbtb4	Maz
FR332443	Egr2	84	484	2063	16638	0.00081709	0.00226219	0610010K14Rik; 2810428I15Rik; Acaca; Acy1; Akap8l; Asna1; Atp5d; Cars2; Cbx3; Ccdc159; Ccni; Cfl1; Cox5a; Cpeb2; Cuta; Dcxr; Dhcr7; Dhx58; Ecsit; Ehbp1l1; Fasn; Foxn2; Foxo3; Gaa; Gps1; Gtf2h4; Haus7; Insr; Ints1; Irs2; Isg15; Kbtbd11; Keap1; Klf11; Lrrc14; Ly6h; Map1lc3b; Map2k2; Matr3; Med24; Metrn; Mfsd3; Mrpl34; Mrpl55; Mrps7; Myl7; N4bp2l1; Ndufb10; Nfya; Nhej1; Notch1; Parp4; Pfn1; Plekhh3;…	Egr2
FR332443	Mitf	42	484	869	16638	0.000883246	0.00242531	Acy1; Aldoa; Alg3; Bhlhe40; Bloc1s3; C1qtnf9; Cfl1; Cuta; Cyb561d2; Dcxr; Eif5a; Fasn; Foxo3; Fzr1; Galns; Gba; Ghdc; Gpi1; Gps1; Gtf2h1; Kcnab2; Klf6; Klhl21; Lrrc14; Matr3; Med24; Myl7; Naa50; Ndufb8; Notch1; Osgin1; Plekhh3; Ppp2r5b; Rasa3; S100a4; Sdhc; Sh2b3; Sssca1; Taf6l; Tbc1d17; Tbl3; Zbtb4	Mitf
FR332443	Smad4	69	484	1638	16638	0.0010547	0.00287256	0610010K14Rik; 8430408G22Rik; Acy1; Ahnak2; Arl4a; Atp5d; Cables1; Ccdc159; Cfl1; Ctdsp2; Ctns; Cuta; Cyb561d2; Dhx40; Dhx58; Ehbp1l1; Fasn; Foxn2; Foxo3; Foxp1; Gnb1l; Inpp5k; Ints1; Kcnab2; Klhl21; Lrrc14; Med11; Med24; Metrn; Mfsd3; Mrps7; Mt2; Myl7; Ndufab1; Nfya; Notch1; Nutf2; Ormdl3; Osbpl11; P2rx6; Pdss1; Peli3; Pex16; Pfn1; Plekhh3; Pnpla2; Ppp1ca; Ppp2r5b; Prpf6; Rasa3; S100a4; Sbds; Sh…	Smad4
FR332443	Ube4a	69	484	1642	16638	0.00112443	0.00301349	0610010K14Rik; Acaca; Ap2s1; Atp5d; Bach2; Cars2; Cbx3; Ccpg1; Cfl1; Cpeb2; Cuta; Dcxr; Ddx50; Deb1; Dnmt1; Ehbp1l1; Eif5a; Fam188b; Fasn; Fkbpl; Foxn2; Foxo3; Gnb1l; Hist1h3g; Idi1; Irs2; Isg15; Klf11; Lpcat3; Lrrc14; Map1lc3b; Matr3; Metrn; Mfsd11; Mfsd3; Mrpl37; Mrpl55; Mrps7; Mta1; Myo19; Ndufc1; Nmral1; Notch1; Nubp1; Nutf2; Peg3; Pfn1; Pih1d1; Plekhh3; Pnpla2; Ppdpf; Ppp1r8; Prpf6; Psmd1; R…	Ube4a
FR332443	Ube4b	69	484	1642	16638	0.00112443	0.00301349	0610010K14Rik; Acaca; Ap2s1; Atp5d; Bach2; Cars2; Cbx3; Ccpg1; Cfl1; Cpeb2; Cuta; Dcxr; Ddx50; Deb1; Dnmt1; Ehbp1l1; Eif5a; Fam188b; Fasn; Fkbpl; Foxn2; Foxo3; Gnb1l; Hist1h3g; Idi1; Irs2; Isg15; Klf11; Lpcat3; Lrrc14; Map1lc3b; Matr3; Metrn; Mfsd11; Mfsd3; Mrpl37; Mrpl55; Mrps7; Mta1; Myo19; Ndufc1; Nmral1; Notch1; Nubp1; Nutf2; Peg3; Pfn1; Pih1d1; Plekhh3; Pnpla2; Ppdpf; Ppp1r8; Prpf6; Psmd1; R…	Ube4b
FR332443	Sox10	61	484	1415	16638	0.00121047	0.00321831	0610010K14Rik; 1110008P14Rik; Acy1; Amigo3; Appl2; Armc5; Atp5d; BC031181; Bach2; Bcl2l1; Bhlhe40; Cars2; Cfl1; Cuta; Cyb561d2; Deb1; Ehbp1l1; Eif5a; Enc1; Foxn2; Foxp1; Hist1h2ab; Hist1h2ak; Kcnab2; Klf6; Klhl21; Mpdu1; Mt1; Mt2; Naa50; Nfya; Notch1; Nutf2; Otud4; Pafah2; Pfn1; Pnpla2; Pnrc1; Ppm1b; Prune; Ptp4a1; Rad54b; Rfc3; Rnf41; Rnpep; Rpl13a; Rps19bp1; S100a4; Sbk1; Sh2b3; Sirt1; Slc25a11…	Sox10
FR332443	Nfkb1	101	484	2609	16638	0.00127376	0.00335992	0610010K14Rik; 5730508B09Rik; 8430408G22Rik; Acox2; Ahnak2; Amigo3; Atp5d; Atp5j2; Bach2; Bin1; Bscl2; Bsdc1; C1rl; Cat; Ccbl2; Cfl1; Chmp6; Cops6; Cuta; Dcxr; Ddrgk1; Ddx50; Deb1; Dhx58; Dnajb2; Ehbp1l1; Eif5a; Etfb; Fads2; Fasn; Fibp; Foxk1; Foxp1; Fzr1; Gaa; Galns; Gmppb; Grina; Gtf2h4; Heca; Ino80c; Inpp5k; Kcnab2; Kcnip3; Klf11; Klf6; Klf9; Las1l; Med11; Med24; Mfsd11; Mmab; Mrps7; Mt1; Mt2;…	Nfkb1
FR332443	Rfx2	41	484	860	16638	0.0013159	0.00339097	0610010K14Rik; 1700029I15Rik; Acy1; Aldoa; Atp5d; Bcl2l1; Bhlhe40; Cars2; Cfl1; Cpeb2; Ctdsp2; Cyb561d2; Ehbp1l1; Fasn; Foxp1; Ints1; Klf6; Lrrc14; Metrn; Mfsd3; Ndufb10; Notch1; Ormdl3; Pex16; Plekhh3; Pnpla2; Ppp1ca; Rasa3; S100a4; Sh2b3; Sharpin; Slc25a1; Sssca1; Tbl3; Tcp11l2; Thoc6; Tpi1; Trabd; Wdr81; Zadh2; Zbtb4	Rfx2
FR332443	Rfx3	41	484	860	16638	0.0013159	0.00339097	0610010K14Rik; 1700029I15Rik; Acy1; Aldoa; Atp5d; Bcl2l1; Bhlhe40; Cars2; Cfl1; Cpeb2; Ctdsp2; Cyb561d2; Ehbp1l1; Fasn; Foxp1; Ints1; Klf6; Lrrc14; Metrn; Mfsd3; Ndufb10; Notch1; Ormdl3; Pex16; Plekhh3; Pnpla2; Ppp1ca; Rasa3; S100a4; Sh2b3; Sharpin; Slc25a1; Sssca1; Tbl3; Tcp11l2; Thoc6; Tpi1; Trabd; Wdr81; Zadh2; Zbtb4	Rfx3
FR332443	Rfx4	41	484	860	16638	0.0013159	0.00339097	0610010K14Rik; 1700029I15Rik; Acy1; Aldoa; Atp5d; Bcl2l1; Bhlhe40; Cars2; Cfl1; Cpeb2; Ctdsp2; Cyb561d2; Ehbp1l1; Fasn; Foxp1; Ints1; Klf6; Lrrc14; Metrn; Mfsd3; Ndufb10; Notch1; Ormdl3; Pex16; Plekhh3; Pnpla2; Ppp1ca; Rasa3; S100a4; Sh2b3; Sharpin; Slc25a1; Sssca1; Tbl3; Tcp11l2; Thoc6; Tpi1; Trabd; Wdr81; Zadh2; Zbtb4	Rfx4
FR332443	Sp1	70	484	1682	16638	0.00133224	0.00340689	0610010K14Rik; Acaca; Acy1; Apip; Atp5d; B3gat3; Cars2; Ccdc159; Cfl1; Cmtm4; Cuta; Dcxr; Dhcr7; Dhx58; Ecsit; Efnb1; Ehbp1l1; Eif5a; Fasn; Fibp; Foxo3; Galns; Grtp1; Irs2; Isg15; Klf11; Lrrc14; Map1lc3b; Med24; Metrn; Mfsd3; Mrpl34; Mrpl55; Mt1; Myl7; Ndufb8; Nmt2; Notch1; Nutf2; Peg3; Pfn1; Plekhh3; Pnpla2; Pnpla7; Ppp1ca; Psmc3; Rasa3; Rnf126; Scarb1; Sgk1; Sh2b3; Slc25a1; Slc25a11; Slc27a1; S…	Sp1
FR332443	Gcm1	41	484	864	16638	0.00143519	0.00364233	0610010K14Rik; Ahnak2; Atp5d; Bhlhe40; Cacna2d2; Cfl1; Cpeb2; Cyb561d2; Dcxr; Deb1; Ehbp1l1; Fasn; Foxo3; Kcnab2; Lrrc14; Med24; Metrn; Mfsd3; Mrpl55; Mta1; Myl7; Ndufb10; Notch1; Pex16; Pfn1; Pnpla2; Ppp1ca; Rasa3; Rfc3; S100a4; Sh2b3; Sharpin; Slc25a1; Slc25a11; Sssca1; Tbl3; Thoc6; Trabd; Wdr81; Wnt11; Zbtb4	Gcm1
FR332443	Foxn1	41	484	868	16638	0.00156385	0.00393902	0610010K14Rik; 2810428I15Rik; 9130023H24Rik; Acy1; Atp5d; C1qtnf9; Cars2; Ddrgk1; Ddx50; Echdc2; Ehbp1l1; Fasn; Foxo3; Gnb1l; Gtf2h1; Idi1; Irs2; Lrrc14; Map1lc3b; Map3k4; March6; Med24; Mertk; Mfsd3; Paip2b; Pex5; Plekhh3; Pnpla2; Prpf6; Raf1; Rnpep; Sharpin; Slc25a10; Sssca1; Tbl3; Trabd; Unkl; Wdr75; Wdr81; Wnt11; Zbtb4	Foxn1
FR332443	Tlx2	40	484	846	16638	0.00174809	0.00434312	0610010K14Rik; Acy1; Aldoa; Amigo3; Atp5d; Bhlhe40; Cbx3; Cfl1; Cuta; Cyb561d2; Ehbp1l1; Eif5a; Fasn; Fibp; Foxp1; Klf6; Lrrc14; Metrn; Mfsd3; Notch1; Pex16; Pfn1; Plekhh3; Pnpla2; Ppp1ca; S100a4; Sh2b3; Sharpin; Slc25a1; Slc25a11; Sssca1; Tbc1d17; Tbl3; Tcp11l2; Thoc6; Tpi1; Trabd; Wdr81; Zadh2; Zbtb4	Tlx2
FR332443	Stat2	103	484	2696	16638	0.00175021	0.00434312	0610010K14Rik; Adprhl2; Armc5; Asna1; Atp5d; B3gat3; Bach2; Bhlhe40; Blmh; Bscl2; C1rl; Cars2; Cfl1; Cpeb2; Crebl2; Ctdsp2; Cuta; Cyb561d2; Cyb5b; Dcaf6; Ddrgk1; Ddx50; Dhx58; Dram2; Ehbp1l1; Etfb; Fam188b; Fibp; Foxo3; Foxp1; Gaa; Gba; Gpi1; Grina; Gtf2h1; Hist1h2ab; Hist1h2ak; Hist1h3g; Ifit1; Isg15; Keap1; Klf6; Klf9; Lox; Lrrc14; Map1lc3b; Mfsd11; Mpdu1; Mt1; Mt2; Myo19; N4bp2l1; Nfkbia; Ormd…	Stat2
FR332443	Xbp1	41	484	877	16638	0.00189082	0.00462562	Amigo3; Anapc13; Arl4a; Asna1; Atp5d; BC031181; Cacna2d2; Cars2; Ccdc8; Ctns; Dcxr; Dhx40; Dnajb2; Efnb1; Fibp; Fkbp5; Gmppb; Gps1; Gtf2h1; Mmab; Mrpl55; Mt2; Mta1; Osgin1; Pnpla2; Ppp1ca; Ppp2r5b; Rabac1; Rbm7; Rhbdl3; Rpl13a; Rps19bp1; Scarb1; Sirt1; Slc25a42; Smpd1; Snrpd2; Tmbim1; Unkl; Wnt11; Zbtb4	Xbp1
FR332443	Nr5a1	48	484	1071	16638	0.00189167	0.00462562	0610010K14Rik; Acy1; Ak2; Aldoa; Amigo3; Apip; Atp5d; Atp5g3; Cfl1; Ctdsp2; Cyb561d2; Dram2; Ehbp1l1; Eif5a; Fibp; Gmppb; Grina; Herpud1; Idh3a; Kcnab2; Klf6; Klhl21; Lrrc14; Lrrc8a; Metrn; Mfsd3; Mrpl34; Mt1; Myl7; Myo19; Ndrg2; Nol12; Pafah2; Pnpla2; Ppp1ca; Psmc3ip; Sbk1; Sdhc; Sh2b3; Sharpin; Slc25a1; Slc25a10; Slc41a1; Sssca1; Tceb2; Vasp; Wdr81; Zadh2	Nr5a1
FR332443	Esr1	41	484	881	16638	0.00205431	0.00498692	1700029I15Rik; Aldoa; Amigo3; Ap1s1; Atp5d; Bach2; Cdca2; Cdk2ap1; Dhx58; Ecsit; Ehbp1l1; Fasn; Foxk1; Gmppb; Gps1; Haus7; Herpud1; Lrrc14; Mfsd3; P2rx6; Pepd; Pex16; Pfn1; Plekhh3; Pnpla2; Ppp1ca; Psmd3; Ptgr1; Rps6kb1; Sh2b3; Slc25a1; Slc25a11; Slc25a42; Sox9; Sssca1; Tbc1d17; Thoc6; Timm13; Tkt; Tmcc3; Wnt11	Esr1
FR332443	Zfp219	40	484	855	16638	0.00211449	0.00509607	0610010K14Rik; Acy1; Anapc13; Ap2s1; Atp5d; B3gat3; Bhlhe40; Cdk2ap1; Cuta; Dnaja1; Dpyd; Ehbp1l1; Eif5a; Foxo3; Foxp1; Gps1; Idi1; Lrrc14; Med24; Metrn; Mfsd11; Mfsd3; Mrpl55; Mrps7; Mta1; Naa50; Nfkbia; Nutf2; Pfdn1; Pfn1; Ppp1ca; Ppp4r1; Sbk1; Slc25a11; Slc25a17; Snx33; Sssca1; Tbc1d17; Thoc6; Trabd	Zfp219
FR332443	Arnt2	40	484	857	16638	0.00220443	0.00518778	Ak2; Aldoa; Ap2s1; Atp5d; Cables1; Cfl1; Cuta; Deb1; Ehbp1l1; Fasn; Foxo3; Gpi1; Ino80c; Lrrc14; Map1lc3b; Metrn; Mfsd3; Mpdu1; Mrps7; Myl7; Notch1; Pfn1; Plekhh3; Pnpla2; Prpf6; Rasa3; Rnf126; Slc25a1; Slc25a10; Sssca1; Tbl3; Tceb2; Thoc6; Timm13; Trabd; Tubb5; Ugdh; Vasp; Wdr81; Zadh2	Arnt2
FR332443	Gtf2a1	40	484	857	16638	0.00220443	0.00518778	0610010K14Rik; Acy1; Aldoa; Alg3; Atp5d; Cacna2d2; Cfl1; Ctdsp2; Cuta; Cyb561d2; Ehbp1l1; Foxo3; Gadd45g; Klf6; Metrn; Mfsd3; Mpdu1; Mrpl33; Myo19; Ndufb10; Pfn1; Plekhh3; Pnpla2; Ppm1b; Ppp1ca; Ppp2r5b; Rasa3; S100a4; Sh2b3; Slc25a1; Slc25a11; Slc41a1; Sssca1; Tbc1d17; Tbl3; Tceb2; Tpi1; Trabd; Wdr81; Zbtb4	Gtf2a1
FR332443	Gtf2a2	40	484	857	16638	0.00220443	0.00518778	0610010K14Rik; Acy1; Aldoa; Alg3; Atp5d; Cacna2d2; Cfl1; Ctdsp2; Cuta; Cyb561d2; Ehbp1l1; Foxo3; Gadd45g; Klf6; Metrn; Mfsd3; Mpdu1; Mrpl33; Myo19; Ndufb10; Pfn1; Plekhh3; Pnpla2; Ppm1b; Ppp1ca; Ppp2r5b; Rasa3; S100a4; Sh2b3; Slc25a1; Slc25a11; Slc41a1; Sssca1; Tbc1d17; Tbl3; Tceb2; Tpi1; Trabd; Wdr81; Zbtb4	Gtf2a2
FR332443	Crx	41	484	885	16638	0.00222997	0.00518778	0610010K14Rik; Acaca; Aldoa; Anapc13; B3gat3; Bckdha; Bscl2; Bsdc1; Copz1; Cuta; Deb1; Ehbp1l1; Fibp; Gba; Kdm4b; Klf9; Med24; Ndrg2; Ndufc1; P2rx6; Pex16; Pfn1; Ppp2r5b; Prpf6; Rnf41; Rpl13a; S100a4; Sh2b3; Slc25a10; Slc25a11; Slc25a42; Snrpd2; Sp2; Sssca1; Taf6l; Thoc6; Tkt; Ugp2; Vasp; Wdr81; Zbtb4	Crx
FR332443	Rax	41	484	885	16638	0.00222997	0.00518778	0610010K14Rik; Acaca; Aldoa; Anapc13; B3gat3; Bckdha; Bscl2; Bsdc1; Copz1; Cuta; Deb1; Ehbp1l1; Fibp; Gba; Kdm4b; Klf9; Med24; Ndrg2; Ndufc1; P2rx6; Pex16; Pfn1; Ppp2r5b; Prpf6; Rnf41; Rpl13a; S100a4; Sh2b3; Slc25a10; Slc25a11; Slc25a42; Snrpd2; Sp2; Sssca1; Taf6l; Thoc6; Tkt; Ugp2; Vasp; Wdr81; Zbtb4	Rax
FR332443	Hoxa4	40	484	860	16638	0.00234556	0.00541906	0610010K14Rik; Acy1; Bach2; Bcl2l1; Cbx3; Cfl1; Ctdsp2; Cuta; Cyb561d2; Ehbp1l1; Enc1; Foxp1; Gtf2h1; Heca; Hist1h2ab; Hist1h2ak; Klf6; Med24; Naa50; Ndufb8; Ndufc1; Nfkbia; Nfya; Otud4; Pfn1; Pnrc1; Ppm1b; Prune; S100a4; Sgk1; Sh2b3; Slc25a11; Ssh2; Sssca1; Tcp11l2; Tubb5; Ugp2; Wdr81; Zadh2; Zbtb4	Hoxa4
FR332443	Rfx5	58	484	1374	16638	0.00257328	0.00582464	0610010K14Rik; 1700029I15Rik; Abhd11; Acy1; Ahnak2; Aldoa; Arl4a; Atp5d; Bcl2l1; Bhlhe40; Cars2; Cfl1; Cpeb2; Ctdsp2; Cuta; Cyb561d2; Dcaf6; Ehbp1l1; Fasn; Foxo3; Foxp1; Gpi1; Ints1; Irs2; Isg15; Kcnab2; Klf6; Lrrc14; Metrn; Mfsd3; Ndufb10; Nfkbia; Notch1; Ormdl3; Otud4; Paip2b; Pex16; Plekhh3; Pnpla2; Ppp1ca; Rasa3; Rhebl1; S100a4; Sh2b3; Sharpin; Slc25a1; Slc25a11; Sssca1; Tbl3; Tcp11l2; Thoc6;…	Rfx5
FR332443	Rfxank	58	484	1374	16638	0.00257328	0.00582464	0610010K14Rik; 1700029I15Rik; Abhd11; Acy1; Ahnak2; Aldoa; Arl4a; Atp5d; Bcl2l1; Bhlhe40; Cars2; Cfl1; Cpeb2; Ctdsp2; Cuta; Cyb561d2; Dcaf6; Ehbp1l1; Fasn; Foxo3; Foxp1; Gpi1; Ints1; Irs2; Isg15; Kcnab2; Klf6; Lrrc14; Metrn; Mfsd3; Ndufb10; Nfkbia; Notch1; Ormdl3; Otud4; Paip2b; Pex16; Plekhh3; Pnpla2; Ppp1ca; Rasa3; Rhebl1; S100a4; Sh2b3; Sharpin; Slc25a1; Slc25a11; Sssca1; Tbl3; Tcp11l2; Thoc6;…	Rfxank
FR332443	Rfxap	58	484	1374	16638	0.00257328	0.00582464	0610010K14Rik; 1700029I15Rik; Abhd11; Acy1; Ahnak2; Aldoa; Arl4a; Atp5d; Bcl2l1; Bhlhe40; Cars2; Cfl1; Cpeb2; Ctdsp2; Cuta; Cyb561d2; Dcaf6; Ehbp1l1; Fasn; Foxo3; Foxp1; Gpi1; Ints1; Irs2; Isg15; Kcnab2; Klf6; Lrrc14; Metrn; Mfsd3; Ndufb10; Nfkbia; Notch1; Ormdl3; Otud4; Paip2b; Pex16; Plekhh3; Pnpla2; Ppp1ca; Rasa3; Rhebl1; S100a4; Sh2b3; Sharpin; Slc25a1; Slc25a11; Sssca1; Tbl3; Tcp11l2; Thoc6;…	Rfxap
FR332443	SFPI1	54	484	1260	16638	0.00263393	0.00591774	0610010K14Rik; Acy1; Aldoa; Atp5d; Bhlhe40; C1rl; Cfl1; Cops6; Ctdsp2; Cuta; Cyb561d2; Ehbp1l1; Eif5a; Fasn; Fibp; Foxo3; Foxp1; Gba; Idi1; Lrrc14; Lrrc8a; Metrn; Mfsd3; Mpdu1; Myo19; Naa50; Ormdl3; Pafah2; Pex16; Pfn1; Pgs1; Pih1d1; Plekhh3; Pnpla2; Ppp1ca; Ppp2r5b; Rasa3; Rnf41; Rps19bp1; S100a4; Sbk1; Sh2b3; Slc25a1; Slc25a11; Slc41a1; Sssca1; Tcp11l2; Tpi1; Trabd; Trim39; Vasp; Wdr81; Zadh2; …	SFPI1
FR332443	Trp53	85	484	2179	16638	0.00266608	0.00591774	0610010K14Rik; 1700029I15Rik; Acer2; Acy1; Ado; Ahnak2; Akap8l; Alg3; Amigo3; Ap1s1; Ap2s1; Atp5d; Bhlhe40; C1rl; Ccdc15; Cfl1; Cpeb2; Ctdsp2; Ctns; Cuta; Cyb561d2; Dcxr; Dhcr7; Ehbp1l1; Ehhadh; Enc1; Fasn; Gpn3; Gps1; Grtp1; Hist1h2ab; Isg15; Kcnab2; Kdm4b; Klf6; Lrrc14; Metrn; Mfsd3; Mmab; Mpdu1; Mrs2; Mt1; Mt2; Myl7; Myo19; Notch1; Nutf2; Pex16; Pfn1; Phyhip; Plekhh3; Pnpla2; Ppp1ca; Prpf6; Pt…	Trp53
FR332443	Gata3	72	484	1788	16638	0.0026674	0.00591774	0610010K14Rik; Actr8; Acy1; Aldoa; Apip; Arl4a; Atp5f1; Bach2; Bcl2l1; Cars2; Cfl1; Crebl2; Cuta; Ddrgk1; Deb1; Dhx58; Ehbp1l1; Eif5a; Fbxo38; Fibp; Fkbpl; Foxo3; Gba; Gde1; Gtf2h1; Higd1a; Hist1h2ak; Kdm3b; Klf6; Mrpl34; Mrpl55; Myo19; N4bp2l1; Naa50; Ndufb8; Nfya; Nmral1; Nutf2; Ormdl3; Otud4; Pafah2; Pcgf5; Peli2; Pepd; Pex16; Pfn1; Plekhh3; Pnpla2; Ppp1ca; Prune; Rab33a; Rasa3; Rnf41; Rpl13a;…	Gata3
FR332443	TCFAP2A	40	484	867	16638	0.0027057	0.00596322	0610010K14Rik; Acy1; Ahnak2; Atp5d; Cfl1; Cpeb2; Dcxr; Ehbp1l1; Fasn; Foxo3; Ints1; Isg15; Lrrc14; Metrn; Mfsd3; Mrps7; Mta1; Myl7; Ndufb10; Notch1; Nutf2; Pfn1; Plekhh3; Pnpla2; Ppdpf; Ppp1ca; Ppp2r5b; Sh2b3; Sharpin; Slc25a1; Slc25a10; Slc25a11; Sssca1; Tbl3; Thoc6; Tpi1; Trabd; Wdr81; Wnt11; Zadh2	TCFAP2A
FR332443	Tead2	40	484	868	16638	0.00276086	0.00604502	0610010K14Rik; Acy1; Aldoa; Atp5d; B3gat3; Bach2; Cars2; Cfl1; Cpeb2; Cuta; Dcxr; Ehbp1l1; Eif5a; Fasn; Foxo3; Irs2; Isg15; Klf11; Lrrc14; Map1lc3b; Metrn; Mfsd3; Mta1; Notch1; Nutf2; Pfn1; Plekhh3; Pnpla2; Ppp1ca; Sh2b3; Slc25a1; Slc25a11; Sssca1; Tbl3; Thoc6; Trabd; Wdr81; Wnt11; Zadh2; Zbtb4	Tead2
FR332443	Hif1a	65	484	1586	16638	0.00288389	0.00623292	0610010K14Rik; Ak2; Aldoa; Ap2s1; Atp5d; Bckdha; Cables1; Cfl1; Cox5a; Cuta; Dcxr; Deb1; Ehbp1l1; Fasn; Foxo3; Galns; Gde1; Gpi1; Ino80c; Klf11; Klf4; Lrrc14; Map1lc3b; Metrn; Mfsd3; Mpdu1; Mrps7; Mt1; Myl7; Myo19; Notch1; Nutf2; Pdk1; Pfn1; Pgam1; Plekhh3; Pnpla2; Ppp4r1; Prpf6; Rasa3; Rbm7; Rnf126; Sharpin; Slc25a1; Slc25a10; Slc25a11; Sssca1; Tbc1d17; Tbl3; Tceb2; Tcp11l2; Tgfbr3; Thoc6; Timm1…	Hif1a
FR332443	Setd2	65	484	1586	16638	0.00288389	0.00623292	0610010K14Rik; Ak2; Aldoa; Ap2s1; Atp5d; Bckdha; Cables1; Cfl1; Cox5a; Cuta; Dcxr; Deb1; Ehbp1l1; Fasn; Foxo3; Galns; Gde1; Gpi1; Ino80c; Klf11; Klf4; Lrrc14; Map1lc3b; Metrn; Mfsd3; Mpdu1; Mrps7; Mt1; Myl7; Myo19; Notch1; Nutf2; Pdk1; Pfn1; Pgam1; Plekhh3; Pnpla2; Ppp4r1; Prpf6; Rasa3; Rbm7; Rnf126; Sharpin; Slc25a1; Slc25a10; Slc25a11; Sssca1; Tbc1d17; Tbl3; Tceb2; Tcp11l2; Tgfbr3; Thoc6; Timm1…	Setd2
FR332443	Gata4	59	484	1411	16638	0.0029192	0.0062688	0610010K14Rik; Actr8; Aldoa; Apip; Arl4a; BC031181; Bach2; Bcl2l1; Bhlhe40; Blvra; Bscl2; Crebl2; Cuta; Deb1; Dpyd; Echdc2; Ehbp1l1; Eif5a; Fbxo38; Foxo3; Foxp1; Gtf2h4; Hist1h2ak; Kdm3b; Klf6; Mt1; Ndufb8; Nfya; Nutf2; Ormdl3; Otud4; Otud7b; Pafah2; Pcgf5; Peli2; Pfn1; Pih1d1; Plekhh3; Prune; Rab33a; Rnf41; S100a4; Sgk1; Sh2b3; Slc25a11; Slc25a42; Slc4a9; Sssca1; Tbc1d17; Tcp11l2; Tmbim1; Tmem53…	Gata4
FR332443	Nfil3	54	484	1272	16638	0.00321205	0.00685373	Abhd11; Ado; Cars2; Cbx3; Cdca2; Ctdsp2; Cyb561d2; Cyb5b; Echdc2; Eif4a2; Gba; Herpud1; Hist1h2ab; Hist1h2ak; Hist1h3f; Idi1; Lrch1; Lrrc8b; Matr3; Metrn; Mrpl34; Mrpl55; Mrs2; Naa50; Net1; Oscp1; Otud4; Peli2; Pkp4; Poln; Psma2; Psmd12; Ptp4a1; Rab32; Rhobtb1; Rnf41; Rpl13a; Rpp14; Rps19bp1; Rps6kb1; Sat1; Sc5d; Sh2b3; Snrnp25; Snx21; Tgfbr3; Tmem123; Tmem53; Trhde; Ttc9c; Usp10; Wdr81; Zbtb4; Z…	Nfil3
FR332443	Zfp354c	38	484	821	16638	0.00325026	0.00689138	0610010K14Rik; Acy1; Aldoa; Atp5d; Cfl1; Cuta; Cyb561d2; Dhx58; Ehbp1l1; Fasn; Fibp; Fzr1; Lrrc14; Metrn; Mfsd3; Myl7; Notch1; Ormdl3; Pex16; Pfn1; Plekhh3; Pnpla2; Ppp1ca; Rasa3; S100a4; Sh2b3; Sharpin; Slc25a1; Slc25a11; Sssca1; Tbc1d17; Tbl3; Thoc6; Tpi1; Trabd; Vasp; Wdr81; Zbtb4	Zfp354c
FR332443	Pou3f1	62	484	1508	16638	0.00336103	0.00708142	0610010K14Rik; Alkbh3; Bach2; Bhlhe40; Bscl2; Cars2; Cbx3; Ccdc159; Cfl1; Crebl2; Cuta; Cyb561d2; Ehbp1l1; Enc1; Fibp; Fkbp5; Foxp1; Gsx1; Heca; Hist1h2ab; Hist1h3f; Hist1h3g; Irs2; Kcnab2; Kdm3b; Klf6; Klf9; Lrch1; Lrrc8b; Matr3; Med24; Mrps11; Mt1; Mt2; Ndufb8; Ndufc1; Ndufv2; Nfkbia; Nfya; Opa3; Pafah2; Pfkfb4; Pfn1; Prmt5; Raf1; S100a4; Sbk1; Sep15; Sh2b3; Slc25a11; Ssh2; Sssca1; Tcp11l2; Tpi…	Pou3f1
FR332443	Ets1	60	484	1451	16638	0.00344763	0.00721848	0610010K14Rik; 1700029I15Rik; Acy1; Aldoa; Atp5d; B3gat3; Bhlhe40; C1rl; Cfl1; Ctdsp2; Cuta; Cyb561d2; Ehbp1l1; Eif5a; Fam188b; Fasn; Fibp; Gba; Idi1; Kcnab2; Klhl21; Metrn; Mpdu1; Mrpl34; Mt2; Myo19; Nfkbia; Nfya; Nol12; Nudt1; Ormdl3; Pafah2; Pex16; Pfn1; Pgs1; Pih1d1; Plekhh3; Pnpla2; Ppp1ca; Ppp2r5b; Rasa3; Rhebl1; Rnf41; S100a4; Sgk1; Sh2b3; Slc25a1; Slc25a11; Slc41a1; Sssca1; Tbc1d17; Tpi1;…	Ets1
FR332443	Srebf2	39	484	853	16638	0.00355204	0.00739089	0610010K14Rik; Ahnak2; Atp5d; Cfl1; Ctdsp2; Cuta; Dhx58; Ehbp1l1; Eif5a; Fasn; Fndc5; Kcnab2; Map2k2; Metrn; Mfsd3; Mrpl34; Mt1; Myl7; Nutf2; Pdk1; Pfn1; Pnpla2; Ppp1ca; Ppp2r5b; Prpf6; S100a4; Sh2b3; Sharpin; Slc25a11; Sssca1; Tbc1d17; Tbl3; Tkt; Tmem53; Trabd; Unkl; Vasp; Wdr81; Zbtb4	Srebf2
FR332443	Smad3	60	484	1455	16638	0.00366255	0.0075738	0610010K14Rik; 8430408G22Rik; Acy1; Ahnak2; Armc5; Atp5d; Bhlhe40; Bsdc1; Ccdc159; Cfl1; Cuta; Cyb561d2; Ehbp1l1; Fasn; Fibp; Foxo3; Ghdc; Gnb1l; Gpi1; Herpud2; Inpp5k; Kcnab2; Lrrc14; Med24; Metrn; Mfsd3; Mt2; Myl7; Ndrg2; Notch1; Nutf2; Ormdl3; Peli3; Pex16; Pfn1; Plekhh3; Pnpla2; Ppp1ca; Ppp2r5b; Prpf6; Rasa3; S100a4; Sh2b3; Sharpin; Slc25a1; Slc25a11; Snx33; Sssca1; Taf6l; Tbl3; Tceb2; Thoc6;…	Smad3
FR332443	Nf1	67	484	1664	16638	0.0037822	0.00777324	0610010K14Rik; 9130023H24Rik; AI413582; Acy1; Akap8l; Aldoa; Amigo3; Asna1; Atp5d; Bhlhe40; Bop1; Cfl1; Cops3; Cpeb2; Cyb561d2; Eif5a; Fasn; Fibp; Galns; Gmppb; Gnb1l; Gps1; Hspbp1; Idi1; Isg15; Klf6; Lrrc14; March6; Metrn; Mfsd11; Mfsd3; Mrpl34; Mrps7; Myl7; Nfkbia; Nmral1; Notch1; Ormdl3; Otud4; Pepd; Pex16; Pfkfb4; Pfn1; Phyhip; Pkp4; Plekhh3; Pnpla2; Ppp1ca; Psmd7; Rfc2; Rnf114; Sh2b3; Sharpi…	Nf1
FR332443	Egr1	78	484	1995	16638	0.00382955	0.00782255	0610010K14Rik; 9130023H24Rik; Acaca; Acy1; Asna1; Atp5d; Cars2; Ccdc159; Ccni; Cfl1; Cpeb2; Ctdsp2; Cuta; Dcxr; Dhcr7; Dhx58; Ecsit; Ehbp1l1; Fasn; Fndc5; Foxn2; Foxo3; Gps1; Haus7; Ints1; Irs2; Isg15; Keap1; Klf11; Klf6; Lrrc14; Ly6h; Map1lc3b; Matr3; Med24; Metrn; Mfsd3; Mrpl34; Mrpl55; N4bp2l1; Ndufb10; Nfya; Nhej1; Notch1; Peli3; Pex5; Pfn1; Pih1d1; Plekhh3; Pnpla2; Ppp1ca; Psmd13; Rabac1; Ra…	Egr1
FR332443	Hinfp	41	484	914	16638	0.00394016	0.00799973	0610010K14Rik; AI413582; Aldoa; Amigo3; Armc5; Cct3; Cebpd; Cfl1; Deb1; Dnajb2; Ehbp1l1; Fasn; Foxo3; Gmppb; Ino80c; Inpp5k; Lpcat3; Mrpl55; Mrps7; Ndufb10; Prmt5; Psmc3ip; Rabac1; Rfc2; Rnf41; Rps19; Sgk1; Sh2b3; Sharpin; Sssca1; Tbc1d17; Tbl3; Thoc6; Tk2; Trim39; Tssc1; Unkl; Usp44; Wasl; Wdr81; Zadh2	Hinfp
FR332443	Stat1	113	484	3090	16638	0.00442423	0.00892842	0610010K14Rik; Acy1; Adprhl2; Aldoa; Armc5; Atp5d; B3gat3; Bach2; Bcl2l1; Bhlhe40; Blmh; Bscl2; C1rl; Cars2; Cbx3; Cfl1; Cops6; Copz1; Cpeb2; Ctdsp2; Cuta; Cyb561d2; Cyb5b; Dbt; Dcaf6; Ddrgk1; Ddx50; Dhx58; Dnaja1; Ehbp1l1; Eif4a2; Eif5a; Etfb; Fads2; Fam188b; Fibp; Foxo3; Foxp1; Gaa; Gba; Gpi1; Grina; Gtf2h1; Hist1h2ab; Hist1h2ak; Hist1h3g; Idi1; Ifit1; Isg15; Klf6; Klf9; Lox; Lrrc14; Map1lc3b; …	Stat1
FR332443	Pdx1	94	484	2501	16638	0.00464939	0.00932662	0610010K14Rik; AI413582; Actr8; Alkbh3; Apip; Appl2; Arl4a; Bach2; C1rl; Cars2; Cbx3; Cfl1; Copz1; Cpne5; Cuta; Cyb561d2; Deb1; Dram2; Ecsit; Ehbp1l1; Eif4a2; Eif5a; Enc1; Fadd; Fbxo38; Fibp; Foxn2; Foxo3; Foxp1; Gba; Glud1; Gss; Heca; Herpud2; Hist1h2ab; Hist1h3f; Hist1h3g; Idi1; Ino80c; Kcnab2; Kdm4b; Klf6; Klf9; Lrch1; Lrrc8a; Med24; Mpdu1; Naa50; Ndufb8; Ndufc1; Net1; Nfya; Otud4; Otud7b; Paf…	Pdx1
FR332443	Hnf4a	92	484	2444	16638	0.00491501	0.00972054	0610010K14Rik; Acy1; Ahnak2; Akap8l; Aldoa; Alg3; Amigo3; Armc5; Atp5d; Bhlhe40; Bsdc1; C1rl; Cfl1; Cops6; Ctdsp2; Cuta; Cyb561d2; Dcxr; Ddrgk1; Dhx58; Dnajb2; Echdc2; Ehbp1l1; Fasn; Fibp; Fkbp5; Foxp1; Gmppb; Gpi1; Grina; Inpp5k; Insr; Kcnab2; Kcnip3; Klf6; Lrrc14; Lrrc8b; Metrn; Mfsd3; Mpdu1; Mrpl34; Mrpl55; Mt1; Myl7; Myo19; N4bp2l1; Ndufab1; Ndufc1; Nfya; Notch1; Nutf2; Opa3; Ormdl3; Pafah2; …	Hnf4a
FR332443	E2f2	40	484	898	16638	0.00493281	0.00972054	Acaca; Apip; BC031181; Cbx3; Deb1; Dnmt1; Eif5a; Fads2; Fkbpl; Foxo3; Gss; Hist1h3f; Idh3a; Irs2; Klf9; Lpcat3; Lrch1; Metrn; Mrpl37; Mrps7; Mt1; Mt2; Myl7; Nubp1; Otud7b; Peg3; Pfn1; Plekhh3; Pnpla2; Ppp1r8; Ppp2r5b; Rfc3; Rhbdl3; Sh2b3; Slc25a10; Slc25a11; Taf6l; Thoc6; Trappc4; Zbtb4	E2f2
FR332443	E2f5	40	484	898	16638	0.00493281	0.00972054	Acaca; Apip; BC031181; Cbx3; Deb1; Dnmt1; Eif5a; Fads2; Fkbpl; Foxo3; Gss; Hist1h3f; Idh3a; Irs2; Klf9; Lpcat3; Lrch1; Metrn; Mrpl37; Mrps7; Mt1; Mt2; Myl7; Nubp1; Otud7b; Peg3; Pfn1; Plekhh3; Pnpla2; Ppp1r8; Ppp2r5b; Rfc3; Rhbdl3; Sh2b3; Slc25a10; Slc25a11; Taf6l; Thoc6; Trappc4; Zbtb4	E2f5
FR332443	Atf5	40	484	899	16638	0.00502507	0.00984444	0610010K14Rik; Armc5; Atp5d; B3gat3; Bach2; Ccni; Cops3; Cuta; Deb1; Dnajb2; Ecsit; Ehbp1l1; Foxp1; Gtf2h1; Heca; Hist1h2ab; Klf11; Lrrc8a; Med11; Med24; Mmab; Mrpl55; Myl7; Opa3; Pkp4; Plekhh3; Pnpla2; Pnrc1; Psmd3; Rell1; Rfc3; Rpl13a; Rpp14; Sdhc; Sssca1; Tbl3; Thoc6; Trim39; Vasp; Zfp839	Atf5
FR332443	Atf6	66	484	1656	16638	0.00511462	0.00996162	0610010K14Rik; Arl4a; Armc5; Atp5d; B3gat3; Bach2; Bscl2; Cars2; Ccdc8; Ccni; Cdk2ap1; Cops3; Cuta; Deb1; Dhx40; Dnajb2; Ecsit; Eefsec; Ehbp1l1; Foxp1; Gtf2h1; Heca; Hist1h2ab; Klf11; Lrrc14; Lrrc8a; March6; Med11; Med24; Mmab; Mpdu1; Mrpl55; Mt1; Myl7; Nfkbia; Opa3; Pkp4; Plekhh3; Pnpla2; Pnrc1; Ppp1ca; Prune2; Psmd3; Rab33a; Rell1; Rfc3; Rhbdl3; Rnf41; Rpl13a; Rpp14; S100a4; Sdhc; Sirt1; Snrpd2…	Atf6
FR332443	Mtf1	39	484	882	16638	0.00616268	0.0118785	Acy1; Adprhl2; Amigo3; Appl2; Atp5d; Cables1; Cpne5; Dcaf6; Eif5a; Foxo3; Fzr1; Gnb1l; Gstm3; Hist1h2ab; Hist1h2ak; Hist1h3g; Hspbp1; Kcnip3; Med11; Metrn; Mt1; Mt2; Myl7; Notch1; Peg3; Pfn1; Pnpla2; Ppdpf; Prpf6; Psmc3; Rell1; Rfc3; Rnpep; Sharpin; Thoc6; Tkt; Unkl; Wnt11; Zadh2	Mtf1
FR332443	Gata6	49	484	1168	16638	0.00616972	0.0118785	0610010K14Rik; Actr8; Aldoa; Apip; Arl4a; Bach2; Cbx3; Cfl1; Crebl2; Cuta; Cyb561d2; Deb1; Ehbp1l1; Eif5a; Fbxo38; Foxo3; Hist1h2ak; Kdm3b; Klf6; Naa50; Ndufb8; Nfya; Nutf2; Ormdl3; Otud4; Pafah2; Pcgf5; Peli2; Pfn1; Rab33a; Rnf41; Rpl13a; S100a4; Sgk1; Sh2b3; Slc25a11; Slc25a42; Slc41a1; Slc4a9; Sssca1; Tcp11l2; Tmem53; Tpi1; Ugp2; Vcp; Wdr7; Wdr81; Zadh2; Zbtb4	Gata6
FR332443	Foxd1	63	484	1582	16638	0.00632379	0.0121055	Anapc13; Arl4a; BC031181; Bach2; C1qtnf9; Cd5l; Cpeb2; Crebl2; Dhrs7; Dhx40; Dram2; Ecsit; Eif4a2; Enc1; Foxo3; Foxp1; Heca; Hist1h2ab; Hist1h2ak; Idi1; Inpp5k; Irs2; Klf6; Klhl21; Klhl24; Lrpprc; Map1lc3b; Med24; Mpdu1; Naa50; Ndrg2; Ndufb11; Ndufs1; Ndufv2; Nmt2; Nudt1; Otud4; Otud7b; Pafah2; Paip2b; Parp4; Pcgf5; Pcnp; Peli2; Pex5; Phyh; Pnrc1; Prune; Rcan2; Rhebl1; Sc5d; Sgk1; Sp2; Ssh2; Tars…	Foxd1
FR332443	Smad1	49	484	1172	16638	0.00657044	0.0125062	0610010K14Rik; 8430408G22Rik; Acy1; Ahnak2; Atp5d; Ccdc159; Cfl1; Cuta; Cyb561d2; Ehbp1l1; Fasn; Foxo3; Gnb1l; Inpp5k; Kcnab2; Lrrc14; Med24; Metrn; Mfsd3; Mt2; Myl7; Notch1; Nutf2; Ormdl3; Peli3; Pex16; Pfn1; Plekhh3; Pnpla2; Ppp1ca; Ppp2r5b; Prpf6; Rasa3; S100a4; Sh2b3; Sharpin; Slc25a1; Slc25a11; Snx33; Sssca1; Taf6l; Tbl3; Tceb2; Thoc6; Tmbim1; Tpi1; Trabd; Wdr81; Zbtb4	Smad1
FR332443	Stat5b	65	484	1653	16638	0.00732825	0.0138698	0610010K14Rik; Appl2; Armc5; Atp5d; Bach2; Bhlhe40; C1rl; Cars2; Cfl1; Ctdsp2; Cuta; Cyb561d2; Dbt; Ddrgk1; Ddx50; Ehbp1l1; Etfb; Fam188b; Fibp; Foxk1; Foxp1; Gaa; Gpi1; Higd1a; Ints1; Kdm3b; Klf6; Lrrc14; Lrrc8a; Map1lc3b; Mpdu1; Myo19; N4bp2l1; Net1; Nfkbia; Ormdl3; Pak2; Pex16; Pfkfb4; Pfn1; Phyh; Pnpla2; Ppp1ca; Rasa3; Rhod; Rnf41; S100a4; S100pbp; Sav1; Sh2b3; Slc25a1; Slc25a11; Slc5a2; Smpd…	Stat5b
FR332443	Wt1	37	484	840	16638	0.00799625	0.0150491	0610010K14Rik; Atp5d; Bhlhe40; Cfl1; Cpeb2; Cuta; Dcxr; Ehbp1l1; Eif5a; Fasn; Foxo3; Foxp1; Irs2; Isg15; Lrrc14; Metrn; Mfsd3; Myl7; Naa50; Notch1; Nutf2; Pfn1; Plekhh3; Pnpla2; Ppp1ca; Rasa3; Sh2b3; Slc25a1; Slc25a11; Sssca1; Tbl3; Thoc6; Trabd; Vasp; Wdr81; Zadh2; Zbtb4	Wt1
FR332443	Gli1	38	484	874	16638	0.00885033	0.0164715	AI413582; Ahnak2; Atp5d; Blmh; Bop1; Cops6; Dcxr; Dhcr7; Eefsec; Fasn; Gnb1l; Gps1; Haus7; Inpp5k; Kcnab2; Kdm4b; Lrrc14; Metrn; Mfsd3; Mpdu1; Nmral1; Osgin1; Plekhh3; Ppp1ca; Rbx1; Rpap1; S100a4; Sh2b3; Slc25a1; Slc25a42; Tbl3; Tceb2; Timm50; Tpi1; Trabd; Wdr75; Wdr81; Zfp839	Gli1
FR332443	Gli3	38	484	874	16638	0.00885033	0.0164715	AI413582; Ahnak2; Atp5d; Blmh; Bop1; Cops6; Dcxr; Dhcr7; Eefsec; Fasn; Gnb1l; Gps1; Haus7; Inpp5k; Kcnab2; Kdm4b; Lrrc14; Metrn; Mfsd3; Mpdu1; Nmral1; Osgin1; Plekhh3; Ppp1ca; Rbx1; Rpap1; S100a4; Sh2b3; Slc25a1; Slc25a42; Tbl3; Tceb2; Timm50; Tpi1; Trabd; Wdr75; Wdr81; Zfp839	Gli3
FR332443	Lmo2	63	484	1610	16638	0.00915357	0.0169417	0610010K14Rik; Abhd11; Acy1; Ahnak2; Aldoa; Ap1s1; Apip; Armc5; Atp5d; Blvra; C1rl; Cfl1; Cyb5b; Ddrgk1; Deb1; Dhcr7; Dhx58; Dnajb2; Ehbp1l1; Fam98a; Fasn; Fibp; Foxn2; Gps1; Ints1; Klhl24; Lrrc14; Metrn; Mfsd3; Mrps7; Myl7; Myo19; Nutf2; Ormdl3; Otud4; Pepd; Pex16; Pfn1; Plekhh3; Pnpla2; Pnpla7; Ppp1ca; Psmd7; Rasa3; Rnf126; Rnf41; Rps19bp1; S100a4; Sc5d; Sgk1; Sh2b3; Sharpin; Slc25a10; Slc25a11…	Lmo2
FR332443	Etv4	45	484	1081	16638	0.00973292	0.017915	0610010K14Rik; Acy1; Atp5d; B3gat3; Bhlhe40; C1rl; Cfl1; Cuta; Cyb561d2; Ehbp1l1; Eif5a; Fbxo38; Fibp; Idi1; Metrn; Mpdu1; Mt2; Myo19; Ormdl3; Pafah2; Peli2; Pfn1; Pgs1; Pih1d1; Plekhh3; Pnpla2; Ppp1ca; Ppp2r5b; Prpf6; Rasa3; Rnf41; Rps19bp1; S100a4; Sh2b3; Sharpin; Slc25a1; Slc25a11; Slc41a1; Sssca1; Tbc1d17; Tpi1; Trabd; Vasp; Wdr81; Zadh2	Etv4
FR332443	Cebpe	37	484	855	16638	0.0104253	0.0190846	0610010K14Rik; Acy1; Aldoa; Armc5; Bach2; Bcl2l1; Bhlhe40; Cfl1; Ctdsp2; Cuta; Cyb561d2; Ehbp1l1; Enc1; Foxp1; Klf6; Med24; Mpdu1; Naa50; Ndufc1; Nfkbia; Nfya; Pafah2; Pex16; Pfn1; Plekhh3; Ppp1ca; Rnf41; S100a4; Sh2b3; Slc25a11; Sssca1; Tbc1d17; Tcp11l2; Tpi1; Wdr81; Zadh2; Zbtb4	Cebpe
FR332443	Spib	49	484	1203	16638	0.0104906	0.0190997	0610010K14Rik; Acy1; Atp5d; Bcl2l1; Bhlhe40; C1rl; Cfl1; Ctdsp2; Cuta; Cyb561d2; Ehbp1l1; Fibp; Foxp1; Gba; Gtf2h1; Klf6; Mpdu1; Mt2; Myo19; Nfya; Ormdl3; Pafah2; Pex16; Pfn1; Pgs1; Pih1d1; Plekhh3; Ppp1ca; Ppp2r5b; Prune; Rasa3; Rhebl1; Rnf41; Rps19bp1; S100a4; Sdhc; Sh2b3; Slc25a1; Slc25a11; Slc41a1; Snrnp200; Sssca1; Tcp11l2; Tpi1; Trabd; Trim39; Vasp; Wdr81; Zadh2	Spib
FR332443	Dbp	37	484	857	16638	0.010791	0.0195405	0610010K14Rik; Acy1; Bach2; Bcl2l1; Bhlhe40; Cars2; Cfl1; Ctdsp2; Cyb561d2; Deb1; Dnajb2; Ehbp1l1; Enc1; Foxp1; Klf6; Klf9; Med24; Mpdu1; Ndufb8; Otud4; Pex16; Pfn1; Plekhh3; Ppp1ca; Prpf6; Rasa3; S100a4; Sdhc; Sgk1; Sh2b3; Slc25a11; Sssca1; Tcp11l2; Tk2; Wdr81; Zadh2; Zbtb4	Dbp
FR332443	Zic2	36	484	837	16638	0.0124825	0.022482	0610010K14Rik; 2810428I15Rik; Acy1; Ahnak2; Atp5d; Cfl1; Cpeb2; Cuta; Cyb561d2; Dcxr; Ehbp1l1; Eif5a; Fasn; Gpi1; Lrrc14; Metrn; Mfsd3; Myl7; Notch1; Pex16; Pfn1; Plekhh3; Pnpla2; Ppp1ca; S100a4; Sh2b3; Sharpin; Slc25a1; Slc25a11; Sssca1; Tbl3; Thoc6; Trabd; Vasp; Wdr81; Zbtb4	Zic2
FR332443	Foxm1	51	484	1285	16638	0.014422	0.0258362	0610010K14Rik; Atp5j2; Bcl2l1; Bscl2; C1qtnf9; Cars2; Cbx3; Ccdc159; Dhcr7; Ehbp1l1; Foxn2; Foxo3; Foxp1; Heca; Hist1h2ak; Hist1h3f; Irs2; Kcnab2; Kdm4b; Klf6; Lrch1; Map1lc3b; March6; Matr3; Mpdu1; Ndufs1; Ndufv2; Otud7b; Pcnp; Pex5; Pfkfb4; Pgs1; Phyh; Prune; Rasa3; Rbm7; Rps6kb1; S100a4; Sbk1; Sdhc; Sep15; Sgk1; Shfm1; Slc25a30; Ssh2; Sssca1; Tcp11l2; Tgfbr3; Tk2; Tmem123; Zadh2	Foxm1
FR332443	Arntl	37	484	878	16638	0.0153089	0.026992	0610010K14Rik; Acy1; Alg3; Atp5d; Bhlhe40; Cfl1; Cuta; Dcxr; Dhcr7; Dhx58; Eif5a; Fasn; Foxo3; Galns; Gps1; Herpud1; Ints1; Klhl21; Lrrc14; Mfsd3; Mmab; Mpdu1; Myl7; Pepd; Ppp1ca; Psmc4; Rasa3; Rhebl1; S100a4; Sh2b3; Slc25a1; Slc25a10; Tbc1d17; Tcp11l2; Timm50; Unkl; Wdr81	Arntl
FR332443	Arntl2	37	484	878	16638	0.0153089	0.026992	0610010K14Rik; Acy1; Alg3; Atp5d; Bhlhe40; Cfl1; Cuta; Dcxr; Dhcr7; Dhx58; Eif5a; Fasn; Foxo3; Galns; Gps1; Herpud1; Ints1; Klhl21; Lrrc14; Mfsd3; Mmab; Mpdu1; Myl7; Pepd; Ppp1ca; Psmc4; Rasa3; Rhebl1; S100a4; Sh2b3; Slc25a1; Slc25a10; Tbc1d17; Tcp11l2; Timm50; Unkl; Wdr81	Arntl2
FR332443	Clock	37	484	878	16638	0.0153089	0.026992	0610010K14Rik; Acy1; Alg3; Atp5d; Bhlhe40; Cfl1; Cuta; Dcxr; Dhcr7; Dhx58; Eif5a; Fasn; Foxo3; Galns; Gps1; Herpud1; Ints1; Klhl21; Lrrc14; Mfsd3; Mmab; Mpdu1; Myl7; Pepd; Ppp1ca; Psmc4; Rasa3; Rhebl1; S100a4; Sh2b3; Slc25a1; Slc25a10; Tbc1d17; Tcp11l2; Timm50; Unkl; Wdr81	Clock
FR332443	Rfx1	91	484	2525	16638	0.0160179	0.0280578	0610010K14Rik; 1700029I15Rik; Abhd11; Acy1; Adprhl2; Ahnak2; Akap8l; Aldoa; Anapc5; Ap1s1; Ap2s1; Apoo; Arl4a; Atp5d; Bcl2l1; Bhlhe40; C2cd3; Cars2; Ccpg1; Cfl1; Chchd3; Cpeb2; Ctdsp2; Cuta; Cyb561d2; Dcaf6; Dnaja1; Efnb1; Ehbp1l1; Enc1; Fam188b; Fasn; Foxn2; Foxo3; Foxp1; Galns; Ghdc; Gpi1; Hspbp1; Ints1; Irs2; Isg15; Kcnab2; Klf6; Klhl21; Lrrc14; Mdh1; Med24; Metrn; Mfsd3; Mmab; Mrpl21; Ndufb10…	Rfx1
FR332443	Rb1	38	484	910	16638	0.0160809	0.0280578	Acaca; Apip; BC031181; Cbx3; Deb1; Dnmt1; Eif5a; Fads2; Fkbpl; Foxo3; Gss; Hist1h3f; Idh3a; Irs2; Klf9; Lpcat3; Lrch1; Mrpl37; Mrps7; Mt1; Mt2; Myl7; Nubp1; Otud7b; Peg3; Pfn1; Pnpla2; Ppp1r8; Ppp2r5b; Psmd1; Rfc3; Rhbdl3; Sh2b3; Slc25a10; Slc25a11; Sox9; Taf6l; Trappc4	Rb1
FR332443	Nfic	56	484	1444	16638	0.0161979	0.0281156	0610010K14Rik; 1700029I15Rik; 2810428I15Rik; 9130023H24Rik; Akap8l; Amigo3; Asna1; Atp5d; Bhlhe40; Cdca2; Cfl1; Cmtm4; Cyb561d2; Eif5a; Enc1; Fasn; Gmppb; Gnb1l; Gpi1; Hist1h3g; Isg15; Lrrc14; Metrn; Mfsd3; Mmp28; Mrpl16; Mrpl34; Mrps7; Mt2; Ndufb11; Nfkbia; Nmral1; Notch1; Ormdl3; Pcgf5; Pfdn1; Pfn1; Plekhh3; Pnpla2; Ppp1ca; Psmd7; Rpp14; Sh2b3; Sh3pxd2a; Sharpin; Slc25a1; Slc25a10; Slc25a42; Sn…	Nfic
FR332443	Tead1	58	484	1510	16638	0.0173229	0.0299132	0610010K14Rik; 1110008P14Rik; Acy1; Ahnak2; Aldoa; Atp5d; Atp5g3; Bhlhe40; Cars2; Cfl1; Ctdsp2; Cuta; Cyb561d2; Ehbp1l1; Fasn; Foxo3; Foxp1; Kcnab2; Klf6; Klhl21; Med24; Metrn; Mpdu1; Mt2; N4bp2l1; Notch1; Ormdl3; Pex16; Pfn1; Pkp4; Plekhh3; Pnpla2; Ppp1ca; Ppp2r5b; Prpf6; Rbx1; Rhod; Rnf41; S100a4; Sh2b3; Sharpin; Slc25a1; Slc25a11; Slc25a42; Slc2a4; Slc5a2; Snx33; Sssca1; Tbc1d17; Thoc6; Tkt; T…	Tead1
FR332443	Nr3c1	87	484	2410	16638	0.0178049	0.030588	0610010K14Rik; Abhd11; Acy1; Ahnak2; Aldoa; Appl2; Arl4a; Atp5d; Bhlhe40; Bsdc1; Cars2; Cebpd; Cfl1; Chchd3; Chmp6; Ctdsp2; Ctns; Cuta; Cyb561d2; Cyb5b; Ddrgk1; Dhx58; Dram2; Ehbp1l1; Etfb; Fasn; Foxk1; Foxo3; Foxp1; Gde1; Gnb1l; Haus7; Heca; Inpp5k; Kcnab2; Kdm4b; Klf6; Klf9; Klhl21; Med24; Mfsd3; Mt1; Mt2; Mta1; Myl7; Myo19; Nfya; Osgin1; Peg3; Pepd; Pex16; Pfn1; Phc3; Plekhh3; Pnpla2; Ppp1ca; …	Nr3c1
FR332443	Hsf2	36	484	859	16638	0.0179338	0.0306522	0610010K14Rik; Alg3; Armc5; BC031181; Bhlhe40; Cbx3; Cuta; Deb1; Ehbp1l1; Ints1; Klf6; Lrrc14; Mrpl55; Mrps7; Naa50; Ndufb8; Notch1; Nutf2; Ormdl3; Pfn1; Plekhh3; Pnpla2; Sh2b3; Slc25a1; Slc25a11; Snx33; Sssca1; Tbl3; Tpi1; Trabd; Tubb5; Ubxn7; Wdr81; Wnt11; Zadh2; Zbtb4	Hsf2
FR332443	Patz1	35	484	832	16638	0.018483	0.0313208	0610010K14Rik; Ap2s1; Atp5d; Cars2; Ccdc159; Ctdsp2; Cuta; Cyb561d2; Dhx58; Dnaja1; Eif5a; Hspbp1; Isg15; Metrn; Mfsd3; Mmgt1; Mrpl55; Naa50; Ncan; Nol12; Notch1; Nutf2; Pfn1; Plekhh3; Ppp2r5b; Rasa3; Scarb1; Slc25a1; Slc25a11; Slc25a17; Trabd; Vasp; Wdr81; Zadh2; Zbtb4	Patz1
FR332443	Il6	36	484	861	16638	0.018512	0.0313208	Aco2; Bhlhe40; Bin1; Cyb561d2; Deb1; Dhx58; Eif4a2; Fadd; Fkbpl; Grtp1; Hist1h2ab; Ifit1; Isg15; Klhl21; Map1lc3b; March6; Mrpl16; Mrpl48; Mt2; Ndufa8; Ndufb10; Nfkbia; Nutf2; Otud4; Pfn1; Pih1d1; Psma2; Rhbdl3; Rpp14; Slc25a11; Ssh2; Tbl3; Timm8a1; Zadh2; Zbtb4; Zfp839	Il6
FR332443	Zbtb7a	35	484	836	16638	0.0197043	0.0331705	0610010K14Rik; Atp5d; Cfl1; Cpeb2; Cuta; Dcxr; Ehbp1l1; Fasn; Gps1; Isg15; Lrrc14; Metrn; Mfsd3; Mta1; Myl7; Ndufb10; Notch1; Nudt1; Pfn1; Plekhh3; Pnpla2; Ppdpf; Ppp1ca; Rasa3; Sh2b3; Sharpin; Slc25a1; Slc25a10; Sssca1; Tbl3; Thoc6; Trabd; Vasp; Wdr81; Wnt11	Zbtb7a
FR332443	Mef2a	131	484	3834	16638	0.0201895	0.0338174	2810428I15Rik; 5730508B09Rik; 8430408G22Rik; Acaca; Actr8; Ahctf1; Aldh1a2; Aldoa; Anapc5; Asna1; Atp5g3; Bhlhe40; Cbx3; Ccdc15; Ccpg1; Cdca2; Cdca7l; Chchd3; Cmtm4; Cox7a2l; Ctns; Dcaf6; Dhrs7; Ecsit; Eif5a; Fam188b; Fbxo38; Foxn2; Foxo3; Foxp1; Glud1; Gnb1l; Gpn3; Gtf3c6; Heca; Herpud2; Hist1h2ab; Hist1h3f; Igfbp7; Inmt; Ints1; Irs2; Kbtbd11; Kcnab2; Klf6; Klf9; Klhl21; Klhl24; Las1l; Map1lc3b;…	Mef2a
FR332443	Foxo1	59	484	1554	16638	0.0203477	0.0339129	4833420G17Rik; Ap2s1; Arl4a; Atp5f1; Bach2; Bop1; Bscl2; Cbx3; Ccpg1; Cdca7l; Crebl2; Ctdsp2; Dhrs7; Dok6; Dpyd; Dram2; Enc1; Foxo3; Foxp1; Gadd45g; Heca; Inpp5k; Insr; Irs2; Klf6; Klhl21; Klhl24; Lrch1; Map1lc3b; Matr3; Med24; Mmab; Mrpl37; Ndufb8; Net1; Nfya; Nmt2; Otud7b; Pcgf5; Pnpla2; Prune; Psmd1; Raf1; Rdm1; Sdhc; Sh3pxd2a; Sp2; Tcp11l2; Tgfbr3; Timm13; Tmbim1; Tmem123; Tmem14c; Ttc9c; Ugp…	Foxo1
FR332443	Hmga2	36	484	873	16638	0.0223022	0.0369863	Bach2; Bcl2l1; Bhlhe40; Cbx3; Crebl2; Eif4a2; Enc1; Foxn2; Foxp1; Heca; Hist1h2ab; Hist1h2ak; Hist1h3g; Kdm3b; Klf6; Klf9; Map3k4; Matr3; Naa50; Ndufb8; Ndufs1; Ndufv2; Nfkbia; Nfya; Otud4; Sgk1; Ssh2; Tcp11l2; Tgfbr3; Trim23; Ttc9c; Tubb5; Ugp2; Vcp; Wasl; Zadh2	Hmga2
FR332443	Foxl1	54	484	1418	16638	0.0246565	0.0406893	Abcb7; Actr8; Anapc13; Bach2; Bhlhe40; Cbx3; Ccni; Ccpg1; Cops3; Cox7a2l; Cpeb2; Dpyd; Enc1; Foxn2; Foxo3; Foxp1; Heca; Hist1h2ab; Hist1h2ak; Inpp5k; Klf6; Lrch1; Lrrc8b; March6; Matr3; Mfsd11; N4bp2l1; Naa50; Ndufb8; Ndufc1; Ndufv2; Net1; Nfya; Otud4; Pcgf5; Peli2; Prune; Psma4; Psmd7; Ptp4a1; Sc5d; Sdhc; Sgk1; Slc25a30; Slc35f5; Ssh2; Tc2n; Tcp11l2; Tgfbr3; Tspan18; Ugdh; Ugp2; Zadh2; Zbtb4	Foxl1
FR332443	Rela	35	484	858	16638	0.0276168	0.0451298	0610010K14Rik; Acox2; Ado; Ap1s1; Cables1; Cuta; Dram2; Ehbp1l1; Gadd45g; Grina; Ino80c; Klf11; Klf6; Klf9; Lrch1; Med11; Myl7; Nfkbia; Ormdl3; Pex16; Pfn1; Ppp1ca; Rad54b; Rnf126; Sh2b3; Sirt1; Slc25a11; Slc2a4; Sssca1; Taf6l; Tbc1d17; Tpi1; Trabd; Unkl; Uqcrc2	Rela
FR332443	Tcf7l2	35	484	858	16638	0.0276168	0.0451298	0610010K14Rik; Bach2; Bcl2l1; Bhlhe40; Cars2; Cfl1; Ctdsp2; Cuta; Deb1; Ehbp1l1; Enc1; Foxo3; Klf6; Klf9; Klhl21; Med24; Mpdu1; Nfya; Pfn1; Pih1d1; Ppp2r5b; Prune; Rasa3; S100a4; Sgk1; Sh2b3; Slc25a11; Ssh2; Sssca1; Tbl3; Tcp11l2; Tgfbr3; Tpi1; Wdr81; Zadh2	Tcf7l2
FR332443	Elf2	62	484	1677	16638	0.0286474	0.0465867	0610010K14Rik; 1700029I15Rik; Abhd11; Acy1; Armc5; Atp5d; B3gat3; Bhlhe40; C1rl; Cfl1; Cuta; Cyb561d2; Dok6; Efnb1; Ehbp1l1; Fads2; Fam188b; Fasn; Fibp; Gadd45g; Gba; Gss; Hspbp1; Ints1; Kcnab2; Klhl21; Mpdu1; Mrpl34; Mt2; Myo19; Ndufv2; Nol12; Nudt1; Ormdl3; Pafah2; Parp4; Pex16; Pfn1; Pgs1; Pih1d1; Plekhh3; Pnpla2; Ppp1ca; Ppp2r5b; Psmc3ip; Rasa3; S100a4; Sh2b3; Sharpin; Slc25a1; Slc25a11; Slc4…	Elf2
FR332443	Tbp	76	484	2122	16638	0.0309969	0.0499269	0610010K14Rik; Ado; Aldoa; Anapc13; Bach2; Bhlhe40; Bscl2; Cables1; Cars2; Cbx3; Cpeb2; Ctdsp2; Dpyd; Dram2; Ecsit; Eif4a2; Enc1; Foxo3; Foxp1; Gadd45g; Ghdc; Glud1; Gtf2h1; Heca; Herpud1; Herpud2; Hist1h2ab; Hist1h2ak; Hist1h3f; Hist1h3g; Kdm3b; Klf6; Klhl21; Lrrc8b; Matr3; Mt1; Mt2; Naa50; Ndrg2; Ndufb10; Ndufc1; Ndufv2; Net1; Nfkbia; Nfya; Nhej1; Nol12; Otud4; Paip2b; Pcgf5; Pink1; Pnrc1; Prun…	Tbp
FR332443	Cuzd1	47	484	1225	16638	0.0311484	0.0499269	0610010K14Rik; 1700029I15Rik; Acy1; Atp5d; B3gat3; Bhlhe40; C1rl; Cfl1; Cuta; Cyb561d2; Ehbp1l1; Fam188b; Fasn; Fibp; Gba; Kcnab2; Klhl21; Mpdu1; Mrpl34; Mt2; Myo19; Nol12; Nudt1; Ormdl3; Pafah2; Pex16; Pfn1; Pgs1; Pih1d1; Plekhh3; Ppp1ca; Ppp2r5b; Rasa3; S100a4; Sh2b3; Slc25a1; Slc25a11; Slc41a1; Sssca1; Tpi1; Trabd; Trappc4; Trim39; Ugdh; Vasp; Wdr81; Zadh2	Cuzd1
FR332443	Fli1	47	484	1225	16638	0.0311484	0.0499269	0610010K14Rik; 1700029I15Rik; Acy1; Atp5d; B3gat3; Bhlhe40; C1rl; Cfl1; Cuta; Cyb561d2; Ehbp1l1; Fam188b; Fasn; Fibp; Gba; Kcnab2; Klhl21; Mpdu1; Mrpl34; Mt2; Myo19; Nol12; Nudt1; Ormdl3; Pafah2; Pex16; Pfn1; Pgs1; Pih1d1; Plekhh3; Ppp1ca; Ppp2r5b; Rasa3; S100a4; Sh2b3; Slc25a1; Slc25a11; Slc41a1; Sssca1; Tpi1; Trabd; Trappc4; Trim39; Ugdh; Vasp; Wdr81; Zadh2	Fli1
FR332443	Pparg	62	484	1689	16638	0.0324774	0.0518091	Acer2; Akap8l; Aldoa; Bach2; Bhlhe40; Cables1; Cacna2d2; Cfl1; Cox7a2l; Cpne5; Ctdsp2; Cuta; Ddrgk1; Dhcr7; Dhx58; Dnmt1; Ehbp1l1; Etfb; Foxp1; Fzr1; Gtf2h4; Idi1; Inmt; Irs2; Isg15; Kdm4b; Klf4; Lrrc14; Mfsd11; Mfsd3; Mmgt1; Mrpl34; Mt1; Naa50; Ndufb8; Ndufs1; Notch1; Nudt1; Ormdl3; Pafah2; Peli3; Pepd; Pex16; Pfkfb4; Pkp4; Ppp1ca; Prune; Psma2; Rhobtb1; Scarb1; Setd8; Slc22a5; Slc25a1; Slc25a10…	Pparg
FR332443	Foxd3	47	484	1229	16638	0.0326891	0.0518998	4833420G17Rik; Acaca; Ap2s1; Atp5j2; Bub1; Cbx3; Cops3; Cpeb2; Ehbp1l1; Fkbp5; Foxo3; Foxp1; Heca; Klf6; Lrpprc; Map1lc3b; March6; Matr3; Med11; Mkrn1; Mrpl48; Ndufs1; Ndufv2; Nutf2; Otud7b; Pcgf5; Pex16; Pgs1; Phyh; Prune; Psma5; Psmc3; Rassf6; Rnf114; Rps6kb1; Sbk1; Sdhc; Sgk1; Shfm1; Snrnp200; Sssca1; Thoc6; Tmem123; Trim23; Usp44; Vasp; Zadh2	Foxd3
FR332443	E4f1	35	484	874	16638	0.0347882	0.0549719	0610010K14Rik; Aldoa; Atp5d; Bhlhe40; Cfl1; Ctdsp2; Cuta; Cyb561d2; D230025D16Rik; Ehbp1l1; Eif5a; Fasn; Hist1h3f; Idi1; Lrrc8a; Mmab; Mpdu1; Mrpl55; Mt1; Myl7; Ormdl3; Plekhh3; Pnpla2; Ppp1ca; Rasa3; Rhbdl3; Rnf41; Rpl13a; Sharpin; Sssca1; Tbc1d17; Tbl3; Wdr81; Zadh2; Zbtb4	E4f1
FR332443	Ctf1	34	484	848	16638	0.0365846	0.0572702	0610010K14Rik; Akap8l; Amigo3; Asna1; Atp5d; Bhlhe40; Cfl1; Cyb561d2; Eif5a; Fasn; Gmppb; Isg15; Lrrc14; Metrn; Mfsd3; Mrpl34; Mrps7; Nfkbia; Nmral1; Notch1; Ormdl3; Pfn1; Plekhh3; Pnpla2; Ppp1ca; Sh2b3; Sharpin; Slc25a1; Slc25a10; Slc25a42; Tbc1d17; Thoc6; Trabd; Wdr81	Ctf1
FR332443	Esco1	34	484	848	16638	0.0365846	0.0572702	0610010K14Rik; Akap8l; Amigo3; Asna1; Atp5d; Bhlhe40; Cfl1; Cyb561d2; Eif5a; Fasn; Gmppb; Isg15; Lrrc14; Metrn; Mfsd3; Mrpl34; Mrps7; Nfkbia; Nmral1; Notch1; Ormdl3; Pfn1; Plekhh3; Pnpla2; Ppp1ca; Sh2b3; Sharpin; Slc25a1; Slc25a10; Slc25a42; Tbc1d17; Thoc6; Trabd; Wdr81	Esco1
FR332443	Rel	35	484	879	16638	0.0372996	0.0581179	0610010K14Rik; Cfl1; Cops6; Cuta; Cyb561d2; Ddrgk1; Dram2; Ehbp1l1; Gba; Grina; Ino80c; Klf11; Klf6; Mrps7; Myl7; Ndufs1; Nfkbia; Nfya; Opa3; Pex16; Pfn1; Plekhh3; Ppp1ca; Rnf126; Rnf41; Sh2b3; Sharpin; Slc25a11; Sssca1; Tbc1d17; Tcp11l2; Tk2; Tpi1; Trabd; Unkl	Rel
FR332443	Pbx1	69	484	1924	16638	0.0381703	0.0591993	0610010K14Rik; Acy1; Aldh1a2; Aldoa; Apip; Atp5f1; BC031181; Bscl2; C1rl; Cars2; Cfl1; Cuta; Cyb561d2; Deb1; Dhcr7; Dpyd; Ebp; Ehbp1l1; Eif5a; Fadd; Fbxo38; Fibp; Heca; Higd1a; Klf4; Klf6; Lrrc8a; Mpdu1; Mrpl16; Ndrg2; Ndufv2; Nmt2; Pafah2; Pcnp; Peg3; Peli2; Pepd; Pfn1; Pih1d1; Plekhh3; Pnpla2; Pnrc1; Ppm1b; Ppp1ca; Psmc4; Rasa3; Rbm7; Rell1; Rnf41; Rpl13a; S100a4; Sbk1; Sh2b3; Sh3pxd2a; Sharpin…	Pbx1
FR332443	Nkx2-2	35	484	882	16638	0.0388714	0.0600088	Actr8; Blvra; Car13; Dcaf6; Ddx50; Dpyd; Eif5a; Fkbp5; Foxn2; Foxp1; Gtf2h1; Herpud2; Hist1h2ab; Hist1h2ak; Hist1h3g; Idi1; Klf11; Klf6; Lrrc8b; Mmp28; Mrpl13; Mrpl33; Ndufc1; Nfya; Otud7b; Ppp2r5b; Rab33a; S100pbp; Sep15; Slc25a42; Taco1; Tcp11l2; Tmem182; Ugp2; Zadh2	Nkx2-2
FR332443	Herpud1	34	484	855	16638	0.0403423	0.061994	Adprhl2; Ahnak2; Akap8l; Aldoa; Arl4a; Atp5d; Atp5j2; Bcl2l1; Bop1; C2cd3; Chmp6; Cpeb2; Cuta; Ehbp1l1; Fasn; Gde1; Gpi1; Lrrc14; Map3k4; Mdh1; Mrpl16; Mrpl21; Mt1; Osgin1; Otud4; Pfn1; Rell1; Rhobtb1; Rnf41; Slc25a1; Slc25a11; Snx33; Tmem123; Trim39	Herpud1
FR332443	Gtf2i	33	484	827	16638	0.041281	0.0631467	0610010K14Rik; Aldoa; Atp5d; Bhlhe40; Ccdc159; Cfl1; Ctdsp2; Cuta; Ehbp1l1; Eif5a; Fasn; Fibp; Foxo3; Foxp1; Isg15; Mrpl55; Ormdl3; Pfn1; Pih1d1; Plekhh3; Pnpla2; Ppp1ca; S100a4; Sh2b3; Slc25a11; Sssca1; Tbl3; Thoc6; Tpi1; Trabd; Unkl; Wdr81; Zbtb4	Gtf2i
FR332443	Nfatc1	45	484	1191	16638	0.0427887	0.064279	0610010K14Rik; Acy1; Adprhl2; Aldoa; Anapc13; Bach2; Bcl2l1; Bhlhe40; Cbx3; Cfl1; Crebl2; Ctdsp2; Cuta; Cyb561d2; Ehbp1l1; Eif4a2; Enc1; Foxn2; Foxp1; Heca; Hist1h3g; Kdm3b; Klf6; Klf9; Lrch1; Naa50; Ndufc1; Nfkbia; Ormdl3; Pafah2; Pfn1; Plekhh3; S100a4; Sgk1; Sh2b3; Slc25a11; Sssca1; Tcp11l2; Tpi1; Vcp; Wdr81; Zadh2; Zbtb4; Zfp68; Zfp839	Nfatc1
FR332443	Nfatc2	45	484	1191	16638	0.0427887	0.064279	0610010K14Rik; Acy1; Adprhl2; Aldoa; Anapc13; Bach2; Bcl2l1; Bhlhe40; Cbx3; Cfl1; Crebl2; Ctdsp2; Cuta; Cyb561d2; Ehbp1l1; Eif4a2; Enc1; Foxn2; Foxp1; Heca; Hist1h3g; Kdm3b; Klf6; Klf9; Lrch1; Naa50; Ndufc1; Nfkbia; Ormdl3; Pafah2; Pfn1; Plekhh3; S100a4; Sgk1; Sh2b3; Slc25a11; Sssca1; Tcp11l2; Tpi1; Vcp; Wdr81; Zadh2; Zbtb4; Zfp68; Zfp839	Nfatc2
FR332443	Nfatc3	45	484	1191	16638	0.0427887	0.064279	0610010K14Rik; Acy1; Adprhl2; Aldoa; Anapc13; Bach2; Bcl2l1; Bhlhe40; Cbx3; Cfl1; Crebl2; Ctdsp2; Cuta; Cyb561d2; Ehbp1l1; Eif4a2; Enc1; Foxn2; Foxp1; Heca; Hist1h3g; Kdm3b; Klf6; Klf9; Lrch1; Naa50; Ndufc1; Nfkbia; Ormdl3; Pafah2; Pfn1; Plekhh3; S100a4; Sgk1; Sh2b3; Slc25a11; Sssca1; Tcp11l2; Tpi1; Vcp; Wdr81; Zadh2; Zbtb4; Zfp68; Zfp839	Nfatc3
FR332443	Nfatc4	45	484	1191	16638	0.0427887	0.064279	0610010K14Rik; Acy1; Adprhl2; Aldoa; Anapc13; Bach2; Bcl2l1; Bhlhe40; Cbx3; Cfl1; Crebl2; Ctdsp2; Cuta; Cyb561d2; Ehbp1l1; Eif4a2; Enc1; Foxn2; Foxp1; Heca; Hist1h3g; Kdm3b; Klf6; Klf9; Lrch1; Naa50; Ndufc1; Nfkbia; Ormdl3; Pafah2; Pfn1; Plekhh3; S100a4; Sgk1; Sh2b3; Slc25a11; Sssca1; Tcp11l2; Tpi1; Vcp; Wdr81; Zadh2; Zbtb4; Zfp68; Zfp839	Nfatc4
FR332443	Egr4	34	484	869	16638	0.0487233	0.0728674	Acaca; Asna1; Atp5d; Ccni; Cpeb2; Cuta; Dcxr; Dhcr7; Ecsit; Ehbp1l1; Foxn2; Foxo3; Haus7; Irs2; Klf11; Ly6h; Matr3; Med24; Metrn; Plekhh3; Ppp1ca; Rasa3; Rhbdl3; Rnpep; Sssca1; Syngr1; Thoc6; Tkt; Trabd; Trim39; Tubb6; Unkl; Uxs1; Wnt11	Egr4
